# Supplementary material for: Swiss ethnoveterinary knowledge on medicinal plants – a within-country comparison of Italian speaking regions with north-western German speaking regions
Source: Springer Nature journal article supplement (doi:10.1186/s13002-016-0106-y), 2017-01-03
Supplement: MOESM1 [file 11970084]

**Additional Document I : Ethnoveterinary herbal remedies used by farmers in a) Italian speaking Regions (Recepy number starts with 1717; Dialogue partner number starts with 203)**

One line in the following table represents one use report: [dialogue partner] x [plant species] x [plant part] x [manufacturing process to the finished product] x [category of use] x [specification of use] x [animal species] x [animal age classification] x [administration procedure]. The [specification of use] is not included in the additional file 1 for space reasons. This explains identical lines.

**List of abbreviations**

**General:**

na= information not available

**Animal treated:**

nsas= no specification of the animal species (external administration)

**Ver= Verification of dosage**

ew= estimated weight by assessment of the volume and subsequent weighing  
od= original drug weighted on- site  
rd= reference drug weighted on- site

**Plant part:**

bar= bark  
exc= excretions  
flo= flowers and inflorescences  
fsb= fruits, seeds, berries  
her= whole plants without roots (herb)  
lea= leaves  
pet= petals  
rob= root/ bulb  
twb= twigs, branches  
wpr= whole plants with roots

**Extraction procedure on farm:**

none  
alcohol: (rt)= room temperature  
(et)= elevated temperature  
milk: (rt)= room temperature  
(et)= elevated temperature  
oil/fat: (rt)= room temperature  
(et)= elevated temperature  
water : (rt)=room temperature  
(dec)=decoction  
(inf)= infusion

**Administration**

exal= external administration, altered or sore skin  
(epicutan)= epicutaneous  
(conj)= conjunctival  
(hoof)= skin appendages - hoofs  
(teud)= skin on teats and udder  
(navel)  
exin= external administration, intact skin  
(epicutan)= epicutaneous  
(conj)= conjunctival  
(teud)= skin on teats and udder  
(hoof)= skin appendages – hoofs  
int= internal administration  
(nasal)= nasal  
(oral)= oral  
(vaut)= intravaginal/ intrauterine  
tohe= treatment of housing environment

**Conc. [g/100g]**

Concentration [g drug in 100g finished product]; used in formulations for topical treatment and intravaginal/ intrauterine administration;  
da= directly administered without extraction, external administration  
tohe= treatment of housing environment

**Daily dosage [g/kg<sup>0.75</sup>]**

in plant equivalent per kg metabolic body weight [g/kg<sup>0.75</sup>];  
used in formulations for oral administration only;

**Origin:**

bo= bought/ crude drug  
bo\*= bought/ commercial extracts and finished products  
cu= cultivated  
re= received by another local farmer  
wh= wild harvesting

**Categories of use:**

QA= gastrointestinal disorders and metabolic dysfunctions;  
QD = skin afflictions and sores;  
QG = genito-urinary system and sex hormones (including peri-partum preparation);  
Mast = mastitis;  
QM = musculoskeletal system (including hematomas and oedema in the connective tissue);  
QP = antiparasitics products, insecticides and repellents;  
QR = respiratory tract agents;  
QS = sensory organs agents;  
QN/behav = nervous system agent and behaviour;  
Varia/GS = various conditions/general strengthen

(vs)= voucher specimen available

(vs\*)= voucher specimen available from former Swiss ethnoveterinary research [22]

**VAS: visual analogue scale in mm (0 mm corresponding with “no effect”, 100 to “very good effect”)**

**RN= Recipe number**

**DP= Dialog partner**

| Botanical family      | Plant species                                | Recepy name designated by DP | Plant part   | Origin | Extraction procedure on farm | ATCvet code     | Animal species treated | Administration  | Daily dosage (g/kg <sup>0,75</sup> ) | Conc. (g/100g) | Ver | VAS  | RN   | DP   |     |
|-----------------------|----------------------------------------------|------------------------------|--------------|--------|------------------------------|-----------------|------------------------|-----------------|--------------------------------------|----------------|-----|------|------|------|-----|
| <b>Amaryllidaceae</b> | <i>Allium ursinum</i> L.                     | aglio orsino                 | lea          | wh     | none                         | QA              | hen                    | Int (oral)      | 2,1                                  |                | ew  | 93   | 1722 | 203  |     |
| <b>Apiaceae</b>       | <i>Foeniculum vulgare</i> Mill.              | finocchio                    | fsb          | bo     | water (inf)                  | QA              | young sheep            | Int (oral)      | 0,17                                 |                | ew  | 3    | 1785 | 213  |     |
|                       |                                              | finocchio                    | fsb          | bo     | water (inf)                  | QA              | dog                    | Int (oral)      | 0,03                                 |                | ew  | 97   | 1804 | 214  |     |
|                       |                                              | finocchio                    | fsb          | bo     | water (inf)                  | QA              | young goat             | Int (oral)      | 0,04                                 |                | ew  | 21   | 1804 | 214  |     |
|                       |                                              | finocchio                    | fsb          | bo     | water (inf)                  | QA              | cat                    | Int (oral)      | 0,06                                 |                | ew  | 98   | 1804 | 214  |     |
| <b>Aspidiaceae</b>    | <i>Dryopteris filix-mas</i> L. (Schott) (vs) | felce                        | her          | wh     | none                         | QP              | sheep                  | Int (oral)      | na                                   |                | na  | 97   | 1833 | 219  |     |
| <b>Asteraceae</b>     | <i>Achillea millefolium</i> L. (vs)          | millefoglie                  | her          | wh     | water (inf)                  | QG peri-partum  | cattle                 | Int (oral)      | 0,08                                 |                | rd  | 81   | 1814 | 217  |     |
|                       |                                              | millefoglie                  | her          | wh     | water (inf)                  | QG peri-partum  | goat                   | Int (oral)      | 0,21                                 |                | rd  | 51   | 1814 | 217  |     |
|                       |                                              | achillea                     | flo          | wh     | water (inf)                  | QA              | sheep                  | Int (oral)      | 0,13                                 |                | ew  | 100  | 1831 | 219  |     |
|                       | <i>Arnica montana</i> L.                     | arnica                       | wpr          | wh     | alcohol (rt)                 | QM              | goat                   | exin (epicutan) |                                      | 1              |     | od   | 100  | 1736 | 204 |
|                       |                                              | arnica                       | wpr          | wh     | alcohol (rt)                 | QM              | cattle                 | exin (epicutan) |                                      | 1              |     | od   | 100  | 1736 | 204 |
|                       |                                              | arnica                       | wpr          | wh     | alcohol (rt)                 | QM              | cattle                 | Int (oral)      |                                      | 1              |     | od   | 100  | 1736 | 204 |
|                       |                                              | arnica                       | wpr          | wh     | alcohol (rt)                 | QG peri-partum  | horse                  | exin (teud)     |                                      | 5,56           |     | od   | 100  | 1736 | 204 |
|                       |                                              | arnica                       | wpr          | wh     | alcohol (rt)                 | QM              | horse                  | exin (epicutan) |                                      | na             |     | od   | 100  | 1736 | 204 |
|                       |                                              | arnica                       | wpr          | wh     | alcohol (rt)                 | QM              | horse                  | Int (oral)      |                                      | na             |     | od   | 100  | 1736 | 204 |
|                       |                                              | arnica                       | wpr          | wh     | alcohol (rt)                 | QM              | goat                   | Int (oral)      |                                      | na             |     | od   | 100  | 1736 | 204 |
|                       |                                              | tintura di arnica            | flo          | wh     | alcohol (rt)                 | QD              | sheep, young sheep     | exal (epicutan) |                                      | 1,36           |     | ew   | 96   | 1812 | 217 |
|                       |                                              | tintura di arnica            | flo          | wh     | alcohol (rt)                 | QD              | goat, young goat       | exal (epicutan) |                                      | 1,36           |     | ew   | 95   | 1812 | 217 |
|                       |                                              | tintura di arnica            | flo          | wh     | alcohol (rt)                 | QD              | young goat             | exal (navel)    |                                      | 1,36           |     | ew   | 96   | 1812 | 217 |
|                       |                                              | tintura di arnica            | flo          | wh     | alcohol (rt)                 | QD              | young sheep            | exal (navel)    |                                      | 1,36           |     | ew   | 97   | 1812 | 217 |
|                       |                                              | tintura di arnica            | flo          | wh     | alcohol (rt)                 | QD              | calf                   | exal (navel)    |                                      | na             |     | ew   | 96   | 1812 | 217 |
|                       |                                              | arnica                       | flo          | wh     | alcohol (rt)                 | QM              | cattle, calf           | exin (epicutan) |                                      | 1,36           |     | ew   | 97   | 1823 | 218 |
|                       |                                              | arnica tintura               | flo          | wh     | alcohol (rt)                 | QD              | sheep, young sheep     | exal (teud)     |                                      | 1,11           |     | ew   | 96   | 1834 | 219 |
|                       |                                              | arnica in acqua              | flo          | wh     | water (rt)                   | QD              | sheep, young sheep     | exal (teud)     |                                      | 1,14           |     | ew   | 95   | 1835 | 219 |
|                       |                                              | arnica                       | flo          | wh     | alcohol (rt)                 | QM              | cattle                 | exin (epicutan) |                                      | 1,11           |     | ew   | 93   | 1839 | 220 |
|                       |                                              | arnica                       | flo          | wh     | alcohol (rt)                 | QM              | cattle, calf           | exin (teud)     |                                      | 1,11           |     | ew   | 95   | 1839 | 220 |
|                       |                                              | arnica                       | flo          | wh     | alcohol (rt)                 | QM              | goat, young goat       | exin (epicutan) |                                      | 1,11           |     | ew   | 95   | 1839 | 220 |
|                       |                                              | arnica                       | flo          | wh     | alcohol (rt)                 | QM              | goat, young goat       | exin (teud)     |                                      | 1,11           |     | ew   | 94   | 1839 | 220 |
| arnica                | flo                                          | wh                           | alcohol (rt) | QM     | horse                        | exin (epicutan) |                        | 2,5             |                                      | ew             | 88  | 1872 | 225  |      |     |
| arnica                | flo                                          | wh                           | alcohol (rt) | QM     | sheep, young sheep           | exin (epicutan) |                        | 2,5             |                                      | ew             | 89  | 1872 | 225  |      |     |

| Botanical family | Plant species                       | Recepy name designated by DP | Plant part | Origin | Extraction procedure on farm | ATCvet code    | Animal species treated | Administration  | Daily dosage (g/kg <sup>0,75</sup> ) | Conc. (g/100g) | Ver | VAS | RN   | DP  |
|------------------|-------------------------------------|------------------------------|------------|--------|------------------------------|----------------|------------------------|-----------------|--------------------------------------|----------------|-----|-----|------|-----|
| Asteraceae       | <i>Artemisia absinthium</i> L. (vs) | erba bianca                  | her        | wh     | none                         | QP             | pig, piglets           | tohe            |                                      | tohe           | na  | 98  | 1842 | 222 |
|                  | <i>Artemisia campestris</i> L.      | artemisia beifus             | rob        | wh     | water (dec)                  | QG peri-partum | goat                   | Int (oral)      | 0,53                                 |                | rd  | na  | 1782 | 212 |
|                  | <i>Calendula officinalis</i> L.     | flemma e calendula           | flo        | cu     | alcohol (rt)                 | QM             | cattle, calf           | exin (epicutan) |                                      | 2              | od  | 70  | 1717 | 203 |
|                  |                                     | flemma e calendula           | flo        | cu     | alcohol (rt)                 | QD             | dog                    | exal (epicutan) |                                      | 2              | od  | 92  | 1717 | 203 |
|                  |                                     | Calendula olio               | flo        | cu     | oil/fat (rt)                 | QM             | goat, young goat       | exin (epicutan) |                                      | 5,55           | ew  | 99  | 1734 | 204 |
|                  |                                     | Calendula olio               | flo        | cu     | oil/fat (rt)                 | QM             | cattle, calf           | exin (epicutan) |                                      | 5,56           | ew  | 99  | 1734 | 204 |
|                  |                                     | Calendula olio               | flo        | cu     | oil/fat (rt)                 | QM             | sheep, young sheep     | exin (epicutan) |                                      | 5,56           | ew  | 99  | 1734 | 204 |
|                  |                                     | Calendula olio               | flo        | cu     | oil/fat (rt)                 | QM             | horse                  | exin (epicutan) |                                      | 5,56           | ew  | 99  | 1734 | 204 |
|                  |                                     | Calendula olio               | flo        | cu     | oil/fat (rt)                 | QD             | goat                   | exal (epicutan) |                                      | 5,56           | ew  | 99  | 1734 | 204 |
|                  |                                     | la calendula                 | flo        | cu     | oil/fat (rt)                 | QD             | goat, young goat       | exal (teud)     |                                      | 2              | ew  | 88  | 1777 | 212 |
|                  |                                     | calendula tintura            | na         | bo*    | none                         | QD             | goat                   | exal (hoof)     |                                      | na             | na  | 85  | 1778 | 212 |
|                  |                                     | calendula crema              | flo        | cu     | oil/fat (et)                 | QD             | sheep                  | exal (navel)    |                                      | na             | ew  | 89  | 1789 | 213 |
|                  |                                     | crema di calendula           | flo        | bo*    | none                         | QD             | goat                   | exal (teud)     |                                      | na             | na  | 100 | 1802 | 214 |
|                  |                                     | calendula tintura            | flo        | cu     | alcohol (rt)                 | QD             | sheep, young sheep     | exal (epicutan) |                                      | 1,43           | ew  | 99  | 1813 | 217 |
|                  |                                     | calendula tintura            | flo        | cu     | alcohol (rt)                 | QD             | goat, young goat       | exal (epicutan) |                                      | 1,43           | ew  | 100 | 1813 | 217 |
|                  |                                     | calendula tintura            | flo        | cu     | alcohol (rt)                 | QD             | cattle, calf           | exal (epicutan) |                                      | 1,43           | ew  | na  | 1813 | 217 |
|                  |                                     | crema di calendula           | flo        | cu     | oil/fat (et)                 | QD             | goat, young goat       | exal (epicutan) |                                      | 1,2            | ew  | 100 | 1819 | 217 |
|                  |                                     | crema di calendula           | flo        | cu     | oil/fat (et)                 | QD             | sheep, young sheep     | exal (epicutan) |                                      | 1,2            | ew  | 100 | 1819 | 217 |
|                  |                                     | crema di calendula           | flo        | cu     | oil/fat (et)                 | QD             | cattle, calf           | exal (epicutan) |                                      | 1,2            | ew  | 98  | 1819 | 217 |
|                  |                                     | calendula                    | flo        | bo*    | none                         | QD             | cattle, calf           | exal (epicutan) |                                      | da             | na  | 91  | 1822 | 218 |
|                  |                                     | calendula pomata             | flo        | cu     | oil/fat (et)                 | QD             | sheep                  | exal (teud)     |                                      | na             | na  | 97  | 1836 | 219 |
|                  |                                     | calendula pomata             | flo        | cu     | oil/fat (et)                 | QM             | sheep, young sheep     | exin (epicutan) |                                      | na             | na  | 93  | 1836 | 219 |
|                  |                                     | calendula pomata             | flo        | cu     | oil/fat (et)                 | QD             | goat                   | exal (teud)     |                                      | 0,48           | ew  | 92  | 1840 | 220 |
|                  |                                     | calendula pomata             | flo        | cu     | oil/fat (et)                 | QD             | cattle                 | exal (teud)     |                                      | 0,48           | ew  | 92  | 1840 | 220 |
|                  |                                     | calendula pomata             | her        | cu     | oil/fat (et)                 | QD             | young sheep            | exal (epicutan) |                                      | 3,85           | ew  | 87  | 1844 | 222 |
|                  |                                     | calendula pomata             | her        | cu     | oil/fat (et)                 | QD             | sheep, young sheep     | exal (epicutan) |                                      | 3,85           | ew  | 77  | 1844 | 222 |
|                  |                                     | calendula pomata             | her        | cu     | oil/fat (et)                 | QD             | cattle, calf           | exal (epicutan) |                                      | 3,85           | ew  | 87  | 1844 | 222 |
|                  |                                     | calendula tintura            | flo        | bo*    | alcohol (rt)                 | QD             | cattle, calf           | exal (epicutan) |                                      | na             | ew  | 99  | 1860 | 223 |
|                  |                                     | calendula tintura            | flo        | bo*    | alcohol (rt)                 | QD             | sheep, young sheep     | exal (epicutan) |                                      | na             | ew  | 98  | 1860 | 223 |
|                  |                                     | calendula tintura            | flo        | bo*    | alcohol (rt)                 | QD             | cattle                 | exal (teud)     |                                      | na             | ew  | 98  | 1860 | 223 |

| Botanical family | Plant species                                                  | Recepy name designated by DP         | Plant part | Origin | Extraction procedure on farm | ATCvet code | Animal species treated | Administration  | Daily dosage (g/kg <sup>0.75</sup> ) | Conc. (g/100g) | Ver | VAS | RN   | DP   |
|------------------|----------------------------------------------------------------|--------------------------------------|------------|--------|------------------------------|-------------|------------------------|-----------------|--------------------------------------|----------------|-----|-----|------|------|
| Asteraceae       | <i>Calendula officinalis</i> L.                                | calendula tintura                    | flo        | bo*    | alcohol (rt)                 | QD          | sheep                  | exal (teud)     |                                      | na             | ew  | 98  | 1860 | 223  |
|                  |                                                                | calendula                            | flo        | bo*    | alcohol (rt)                 | QD          | cattle, calf           | exal (epicutan) |                                      | na             | ew  | 99  | 1861 | 224  |
|                  |                                                                | crema di calendula weleda            | flo        | bo*    | none                         | QD          | horse                  | exal (epicutan) |                                      | na             | na  | 90  | 1871 | 225  |
|                  |                                                                | crema di calendula weleda            | flo        | bo*    | none                         | QD          | dog                    | exal (hoof)     |                                      | na             | na  | 95  | 1871 | 225  |
|                  |                                                                | crema di calendula weleda            | flo        | bo*    | none                         | QD          | horse                  | exal (epicutan) |                                      | na             | na  | 95  | 1871 | 225  |
|                  | <i>Matricaria recutita</i> L. (vs*)                            | la camomela                          | flo        | cu     | water (inf)                  | QD          | cattle                 | Int (oral)      | 0,18                                 |                | rd  | 53  | 1755 | 209  |
|                  |                                                                | la camomela                          | flo        | cu     | water (inf)                  | QD          | calf                   | Int (oral)      | na                                   |                | rd  | 53  | 1755 | 209  |
|                  |                                                                | camomilla                            | flo        | bo     | water (inf)                  | QS          | young sheep            | exal (conj)     |                                      | 0,75           | rd  | 50  | 1768 | 211  |
|                  |                                                                | camomilla                            | flo        | cu     | water (inf)                  | QA          | cattle                 | Int (oral)      | 0,29                                 |                | rd  | 80  | 1816 | 217  |
|                  |                                                                | camomilla                            | flo        | cu     | water (inf)                  | QA          | sheep                  | Int (oral)      | 1,2                                  |                | rd  | 66  | 1816 | 217  |
|                  |                                                                | camomilla                            | flo        | cu     | water (inf)                  | QA          | goat                   | Int (oral)      | 1,2                                  |                | rd  | 100 | 1816 | 217  |
|                  |                                                                | camomilla                            | flo        | cu     | water (dec)                  | QD          | calf                   | exal (navel)    |                                      | 0,5            | rd  | 95  | 1829 | 218  |
|                  |                                                                | camomilla                            | flo        | cu     | water (dec)                  | Varia/GS    | horse                  | exin (epicutan) |                                      | 0,5            | rd  | 93  | 1829 | 218  |
|                  |                                                                | camomilla                            | flo        | cu     | water (dec)                  | QD          | cattle, calf           | exal (epicutan) |                                      | 0,5            | rd  | 92  | 1829 | 218  |
|                  |                                                                | camomilla                            | flo        | cu     | water (dec)                  | QA          | cattle                 | Int (oral)      | na                                   |                | rd  | 90  | 1829 | 218  |
|                  | <i>Taraxacum officinale</i> Weber Ex F.H. Wigg.                | Tarassaco tintura                    | her        | bo*    | none                         | QA          | sheep                  | Int (oral)      | na                                   |                | od  | 87  | 1765 | 211  |
|                  |                                                                | Tarassaco tintura                    | her        | bo*    | none                         | QD          | horse                  | Int (oral)      | na                                   |                | od  | 90  | 1765 | 211  |
|                  |                                                                | Tarassaco                            | wpr        | wh     | alcohol (rt)                 | QD          | horse                  | Int (oral)      | 0,04                                 |                | ew  | 80  | 1766 | 211  |
|                  |                                                                | Tarassaco                            | wpr        | wh     | alcohol (rt)                 | QA          | sheep                  | Int (oral)      | 0,27                                 |                | ew  | 88  | 1766 | 211  |
|                  | Boraginaceae                                                   | <i>Symphytum officinale</i> L. (vs*) | Consolida  | rob    | wh                           | none        | QM                     | goat            | exin (epicutan)                      |                | da  | na  | 93   | 1781 |
| Brassicaceae     | <i>Brassica oleracea</i> L. (convar. Capitata var. Sabauda L.) | foglie di cavolo verza               | lea        | cu     | none                         | QD          | cattle, calf           | exal (epicutan) |                                      | da             | od  | 83  | 1748 | 209  |
| Caryophyllaceae  | <i>Stellaria media</i> (L.) Vill. (vs)                         | erba di gallin o peverina            | her        | cu     | none                         | Varia/GS    | hen                    | Int (oral)      | 20                                   |                | od  | 94  | 1724 | 203  |
|                  |                                                                | paverina                             | her        | wh     | none                         | Varia/GS    | hen                    | Int (oral)      | 16                                   |                | ew  | 100 | 1818 | 217  |
| Cucurbitaceae    | <i>Cucurbita maxima</i> Duch.                                  | semi di zucca                        | fsb        | cu     | none                         | QP          | young goat             | Int (oral)      | na                                   |                | na  | na  | 1770 | 211  |
|                  |                                                                | semi di zucca                        | fsb        | cu     | none                         | QP          | goat                   | Int (oral)      | na                                   |                | na  | na  | 1770 | 211  |
| Euphorbiaceae    | <i>Ricinus communis</i> L.                                     | olio di ricino                       | fsb        | bo*    | none                         | QA          | young sheep            | Int (oral)      | na                                   |                | na  | 99  | 1788 | 213  |
| Fagaceae         | <i>Castanea sativa</i> Mill.                                   | La corteccia del castagno            | bar        | wh     | none                         | QP          | goat                   | Int (oral)      | na                                   |                | na  | na  | 1769 | 211  |
|                  |                                                                | la corteccia del castagno            | bar        | wh     | none                         | QP          | young goat             | Int (oral)      | na                                   |                | na  | na  | 1769 | 211  |
|                  | <i>Quercus robur</i> L.                                        | corteccia di quercia                 | bar        | wh     | water (dec)                  | QA          | young goat             | Int (oral)      | 3,51                                 |                | ew  | 87  | 1739 | 205  |
| Gentianaceae     | <i>Gentiana purpurea</i> L.                                    | genziana                             | rob        | wh     | none                         | QA          | cattle                 | Int (oral)      | 0,05                                 |                | na  | 81  | 1754 | 209  |

| Botanical family    | Plant species                       | Recepy name designated by DP       | Plant part | Origin | Extraction procedure on farm | ATCVet code    | Animal species treated | Administration  | Daily dosage (g/kg <sup>0.75</sup> ) | Conc. (g/100g) | Ver  | VAS | RN   | DP  |
|---------------------|-------------------------------------|------------------------------------|------------|--------|------------------------------|----------------|------------------------|-----------------|--------------------------------------|----------------|------|-----|------|-----|
| <b>Gentianaceae</b> | <i>Gentiana purpurea</i> L.         | genziana                           | rob        | wh     | water (dec)                  | QA             | cattle                 | Int (oral)      | 0,23                                 |                | rd   | 96  | 1824 | 218 |
| <b>Hypericaceae</b> | <i>Hypericum perforatum</i> L. (vs) | Iperico                            | her        | wh     | oil/fat (rt)                 | QD             | nsas                   | exal (epicutan) |                                      | 1,85           | ew   | 100 | 1737 | 204 |
|                     |                                     | Iperico                            | her        | wh     | oil/fat (rt)                 | QN             | goat                   | Int (oral)      | na                                   |                | ew   | 45  | 1737 | 204 |
|                     |                                     | olio di iperico                    | flo        | re     | oil/fat (rt)                 | Mast           | sheep                  | exin (teud)     |                                      | na             | na   | 97  | 1832 | 219 |
|                     |                                     | olio rosso                         | flo        | wh     | oil/fat (rt)                 | QD             | young sheep            | exal (epicutan) |                                      | 2,86           | ew   | 99  | 1841 | 221 |
|                     |                                     | olio rosso                         | flo        | wh     | oil/fat (rt)                 | QD             | sheep                  | exal (teud)     |                                      | 2,86           | ew   | 82  | 1841 | 221 |
|                     |                                     | olio di san giovanni               | flo        | wh     | oil/fat (rt)                 | QM             | horse                  | exin (epicutan) |                                      | 2,5            | ew   | 54  | 1873 | 225 |
| <b>Juglandaceae</b> | <i>Juglans regia</i> L.             | noce                               | lea        | wh     | none                         | QP             | dog                    | exin (epicutan) |                                      | da             | na   | 98  | 1846 | 223 |
| <b>Lamiaceae</b>    | <i>Lavandula angustifolia</i> Mill. | la lavanda                         | wpr        | cu     | none                         | QP             | nsas                   | tohe            |                                      | tohe           | od   | na  | 1773 | 211 |
|                     | <i>Salvia verbenacea</i> L.         | salvia selvatica                   | lea        | wh     | none                         | QD             | cattle                 | exal (epicutan) |                                      | da             | od   | 95  | 1751 | 209 |
| <b>Lauraceae</b>    | <i>Cinnamomum verum</i> J.PRESL     | vin brulè                          | bar        | bo     | alcohol (et)                 | QA             | cattle                 | Int (oral)      | na                                   |                | na   | na  | 1825 | 218 |
| <b>Liliaceae</b>    | <i>Allium cepa</i> L.               | sciroppo per la tosse alla cipolla | rob        | bo     | honey (rt)                   | QR             | horse                  | Int (oral)      | 0,19                                 |                | ew   | 89  | 1868 | 225 |
|                     | <i>Allium sativum</i> L.            | aglio                              | rob        | bo     | none                         | QP             | turkey                 | Int (oral)      | 0,27                                 |                | na   | 96  | 1720 | 203 |
|                     |                                     | aglio                              | rob        | bo     | none                         | QP             | turkey                 | Int (oral)      | 0,27                                 |                | na   | 96  | 1720 | 203 |
|                     |                                     | aglio                              | rob        | bo     | none                         | QP             | hen                    | Int (oral)      | 1,7                                  |                | na   | 95  | 1720 | 203 |
|                     |                                     | aglio                              | rob        | bo     | none                         | QP             | hen                    | Int (oral)      | 1,7                                  |                | na   | 96  | 1720 | 203 |
|                     |                                     | aglio                              | rob        | bo     | none                         | QP             | cattle                 | Int (oral)      | 1,24                                 |                | od   | 99  | 1760 | 210 |
|                     |                                     | aglio                              | rob        | bo     | none                         | QP             | calf                   | Int (oral)      | 3,14                                 |                | od   | 99  | 1760 | 210 |
|                     |                                     | aglio                              | rob        | bo     | none                         | QP             | goat                   | Int (oral)      | 0,54                                 |                | ew   | 76  | 1800 | 214 |
|                     |                                     | aglio                              | rob        | bo     | none                         | QP             | dog                    | Int (oral)      | 0,3                                  |                | ew   | na  | 1843 | 222 |
| aglio               | rob                                 | bo                                 | none       | QP     | cat                          | Int (oral)     | 0,61                   |                 | ew                                   | 75             | 1843 | 222 |      |     |
| <b>Linaceae</b>     | <i>Linum usitatissimum</i> L.       | cura rinfrescante                  | fsb        | bo     | none                         | Varia/GS       | cattle                 | Int (oral)      | na                                   |                | na   | 98  | 1726 | 203 |
|                     |                                     | linosa                             | fsb        | bo     | water (rt)                   | QG peri-partum | cattle                 | Int (oral)      | 3,66                                 |                | rd   | 80  | 1727 | 203 |
|                     |                                     | linosa                             | fsb        | bo     | water (rt)                   | QG peri-partum | pig                    | Int (oral)      | 8,85                                 |                | rd   | 79  | 1727 | 203 |
|                     |                                     | semi di lino                       | fsb        | bo     | water (rt)                   | QA             | horse                  | Int (oral)      | 3,89                                 |                | rd   | 83  | 1728 | 204 |
|                     |                                     | shmellin                           | fsb        | bo     | water (rt)                   | QG peri-partum | cattle                 | Int (oral)      | 3,16                                 |                | rd   | 98  | 1744 | 207 |
|                     |                                     | shmellin                           | fsb        | bo     | water (rt)                   | Varia/GS       | cattle                 | Int (oral)      | 3,16                                 |                | rd   | 99  | 1744 | 207 |
|                     |                                     | shmellin                           | fsb        | bo     | water (rt)                   | Varia/GS       | cattle                 | Int (oral)      | 3,15                                 |                | rd   | 79  | 1745 | 205 |
|                     |                                     | shmellin                           | fsb        | bo     | water (rt)                   | Varia/GS       | goat                   | Int (oral)      | 9,97                                 |                | rd   | 76  | 1745 | 205 |
|                     |                                     | linosa                             | fsb        | bo     | water (rt)                   | QG peri-partum | cattle                 | Int (oral)      | 3,45                                 |                | rd   | 73  | 1757 | 209 |
|                     |                                     | semi di lino                       | fsb        | bo     | none                         | QG peri-partum | goat                   | Int (oral)      | na                                   |                | rd   | na  | 1774 | 211 |

| Botanical family | Plant species                      | Recepy name designated by DP        | Plant part | Origin | Extraction procedure on farm | ATCvet code    | Animal species treated | Administration  | Daily dosage (g/kg <sup>0,75</sup> ) | Conc. (g/100g) | Ver | VAS | RN   | DP   |
|------------------|------------------------------------|-------------------------------------|------------|--------|------------------------------|----------------|------------------------|-----------------|--------------------------------------|----------------|-----|-----|------|------|
| Linaceae         | <i>Linum usitatissimum</i> L.      | semi di lino                        | fsb        | bo     | none                         | QG peri-partum | sheep                  | Int (oral)      | na                                   |                | na  | na  | 1787 | 213  |
|                  |                                    | linosa                              | fsb        | bo     | water (rt)                   | QG peri-partum | goat                   | Int (oral)      | 15,96                                |                | rd  | 100 | 1797 | 214  |
|                  |                                    | semi di lino                        | fsb        | bo     | water (rt)                   | QG peri-partum | goat                   | Int (oral)      | 1,6                                  |                | rd  | 85  | 1817 | 217  |
|                  |                                    | semi di lino                        | fsb        | bo     | water (dec)                  | QG peri-partum | cattle                 | int (vaut)      | 0,19                                 |                | rd  | 96  | 1827 | 218  |
|                  |                                    | linosa                              | fsb        | bo     | water (rt)                   | Varia/GS       | cattle                 | Int (oral)      | 0,8                                  |                | rd  | 77  | 1865 | 223  |
|                  |                                    | semi di lino                        | fsb        | bo     | water (rt)                   | QA             | horse                  | Int (oral)      | 0,13                                 |                | ew  | 91  | 1869 | 225  |
| Loranthaceae     | <i>Viscum album</i> L. S.L.        | vischio                             | her        | wh     | none                         | QG             | nsas                   | tohe            |                                      | tohe           | na  | na  | 1772 | 211  |
| Malvaceae        | <i>Malva neglecta</i> Wallr. (vs*) | la malva selvatica                  | lea        | wh     | water (inf)                  | QA             | goat                   | Int (oral)      | 1,77                                 |                | ew  | 96  | 1741 | 205  |
|                  |                                    | la malva selvatica                  | lea        | wh     | water (inf)                  | QA             | calf                   | Int (oral)      | 4,57                                 |                | ew  | 95  | 1741 | 205  |
|                  |                                    | malva domestica                     | her        | wh     | water (inf)                  | QD             | goat                   | exal (hoof)     | 0,05                                 |                | rd  | 30  | 1779 | 212  |
|                  |                                    | malva domestica                     | her        | wh     | water (inf)                  | QD             | goat                   | Int (oral)      | na                                   |                | rd  | na  | 1779 | 212  |
|                  |                                    | malva                               | lea        | wh     | water (inf)                  | QD             | cattle                 | exin (hoof)     |                                      | 0,43           | rd  | 86  | 1806 | 215  |
|                  |                                    | malva                               | lea        | wh     | water (dec)                  | QG peri-partum | cattle                 | int (vaut)      | 0,03                                 |                | rd  | 99  | 1826 | 218  |
|                  |                                    | malva                               | her        | wh     | water (inf)                  | QD             | cattle, calf           | exal (hoof)     |                                      | 0,13           | rd  | 72  | 1838 | 220  |
|                  |                                    | acqua malva                         | wpr        | wh     | water (dec)                  | QD             | calf                   | exal (navel)    |                                      | 0,40           | rd  | 74  | 1862 | 224  |
|                  |                                    | acqua malva                         | wpr        | wh     | water (dec)                  | QD             | cattle                 | exal (teud)     |                                      | 0,4            | rd  | 74  | 1862 | 224  |
|                  |                                    | acqua malva                         | wpr        | wh     | water (dec)                  | QD             | calf                   | exal (navel)    |                                      | 0,40           | rd  | 74  | 1863 | 223  |
|                  |                                    | acqua malva                         | wpr        | wh     | water (dec)                  | QD             | cattle                 | exal (teud)     |                                      | 0,4            | rd  | 75  | 1863 | 223  |
|                  |                                    | acqua malva                         | wpr        | wh     | water (dec)                  | QD             | cattle, calf           | exal (epicutan) |                                      | 0,4            | rd  | 75  | 1863 | 223  |
|                  | <i>Malva sylvestris</i> L.         | la malva domestica                  | lea        | wh     | water (inf)                  | QA             | goat                   | Int (oral)      | 1,77                                 |                | ew  | 96  | 1740 | 205  |
|                  |                                    | la malva domestica                  | lea        | wh     | water (inf)                  | QA             | calf                   | Int (oral)      | 4,57                                 |                | ew  | 95  | 1740 | 205  |
|                  |                                    | malva                               | her        | wh     | water (dec)                  | QD             | cattle                 | exal (epicutan) |                                      | 2,5            | rd  | 63  | 1750 | 209  |
|                  |                                    | malva                               | her        | wh     | water (dec)                  | QD             | horse                  | exal (epicutan) |                                      | 2,5            | rd  | 61  | 1750 | 209  |
|                  |                                    | malva selvatica                     | her        | wh     | water (inf)                  | QD             | cattle, calf           | exal (hoof)     |                                      | 0,13           | rd  | 73  | 1877 | 220  |
|                  | Myrtaceae                          | <i>Eugenia caryophyllata</i> Thunb. | vin brulè  | flo    | bo                           | alcohol (et)   | QG peri-partum         | cattle          | Int (oral)                           | na             |     | na  | na   | 1759 |
| Oleaceae         | <i>Olea europaea</i> L.            | olio sale e aceto                   | fsb        | bo     | none                         | QA             | sheep                  | Int (oral)      | na                                   |                | od  | 100 | 1786 | 213  |
|                  |                                    | olio d'oliva                        | fsb        | bo     | none                         | QD             | calf                   | exin (epicutan) |                                      | da             | ew  | 89  | 1864 | 224  |
| Pinaceae         | <i>Abies alba</i> Mill.            | resina                              | exc        | wh     | none                         | QP             | goat                   | Int (oral)      | na                                   |                | na  | 99  | 1733 | 204  |
|                  |                                    | resina                              | exc        | wh     | none                         | QP             | young goat             | Int (oral)      | na                                   |                | na  | 99  | 1733 | 204  |
|                  | <i>Picea abies</i> (L.)H. Karst.   | labbiot                             | exc        | wh     | none                         | QM             | goat, young goat       | exin (epicutan) |                                      | da             | na  | 100 | 1821 | 218  |
|                  |                                    | resina                              | exc        | wh     | none                         | QD             | sheep                  | exal (hoof)     |                                      | da             | na  | 99  | 1837 | 219  |

| Botanical family | Plant species                                | Recepy name designated by DP | Plant part  | Origin | Extraction procedure on farm | ATCVet code    | Animal species treated | Administration  | Daily dosage (g/kg <sup>0.75</sup> ) | Conc. (g/100g) | Ver  | VAS | RN   | DP  |
|------------------|----------------------------------------------|------------------------------|-------------|--------|------------------------------|----------------|------------------------|-----------------|--------------------------------------|----------------|------|-----|------|-----|
| Pinaceae         | <i>Picea abies</i> (L.)H. Karst.             | resina                       | exc         | wh     | none                         | QM             | sheep, young sheep     | exal (epicutan) |                                      | da             | na   | 99  | 1837 | 219 |
|                  |                                              | resina di abete              | exc         | wh     | none                         | QM             | nsas                   | exal (epicutan) |                                      | da             | na   | 93  | 1850 | 223 |
| Poaceae          | <i>Avena sativa</i> L.                       | avena                        | fsb         | bo     | none                         | QG             | goat                   | Int (oral)      | 5,32                                 |                | ew   | 97  | 1801 | 214 |
|                  | <i>Hordeum vulgare</i> L. S.L.               | orzo                         | fsb         | bo     | none                         | QG peri-partum | goat                   | Int (oral)      | 5,31                                 |                | od   | 100 | 1798 | 214 |
|                  | <i>Oryza sativa</i> L.                       | riso bollito                 | fsb         | bo     | water (dec)                  | QA             | calf                   | Int (oral)      |                                      | 16,66          | od   | 75  | 1718 | 203 |
|                  |                                              | acqua del riso               | fsb         | bo     | water (dec)                  | QA             | calf                   | Int (oral)      | 15,7                                 |                | od   | 94  | 1763 | 210 |
|                  |                                              | acqua di riso                | fsb         | bo     | water (dec)                  | QA             | young goat             | Int (oral)      | 17,54                                |                | ew   | 79  | 1859 | 223 |
|                  |                                              | acqua di riso                | fsb         | bo     | water (dec)                  | QA             | calf                   | Int (oral)      | 26,14                                |                | ew   | 79  | 1859 | 223 |
|                  | <i>Triticum aestivum</i> L.                  | laitada                      | fsb         | bo     | water (inf)                  | QG peri-partum | cattle                 | Int (oral)      | 15,54                                |                | ew   | 50  | 1876 | 227 |
| Rhamnaceae       | <i>Rhamnus catharticus</i> L. (vs)           | kreuzdorn                    | twb         | cu     | none                         | QD             | calf                   | tohe            |                                      | tohe           | na   | 94  | 1845 | 222 |
|                  |                                              | kreuzdorn                    | twb         | cu     | none                         | QD             | cattle, calf           | tohe            |                                      | tohe           | na   | na  | 1874 | 226 |
| Rosaceae         | <i>Potentilla erecta</i> (L.) Rauschel (vs*) | potentilla o tormentilla     | her         | bo     | none                         | QA             | calf                   | Int (oral)      | na                                   |                | na   | 94  | 1780 | 212 |
| Rubiaceae        | <i>Coffea</i> spp.                           | caffè con vino               | fsb         | bo     | water (dec)                  | QG peri-partum | cattle                 | Int (oral)      | 1,55                                 |                | rd   | 91  | 1742 | 205 |
|                  |                                              | caffè con vino               | fsb         | bo     | water (dec)                  | QG peri-partum | goat                   | Int (oral)      | 5,32                                 |                | rd   | 92  | 1742 | 205 |
|                  |                                              | caffè con grappa             | fsb         | bo     | water (dec)                  | QA             | cattle                 | Int (oral)      | 0,93                                 |                | od   | na  | 1743 | 206 |
|                  |                                              | caffè con grappa             | fsb         | bo     | water (dec)                  | QA             | cattle                 | Int (oral)      | 0,31                                 |                | rd   | 60  | 1753 | 209 |
|                  |                                              | un intruglio di caffè e vino | fsb         | bo     | water (dec)                  | QG             | cattle                 | Int (oral)      | na                                   |                | na   | na  | 1771 | 211 |
|                  |                                              | grappa e caffè               | fsb         | bo     | water (inf)                  | QG peri-partum | goat                   | Int (oral)      | 2,47                                 |                | od   | 100 | 1793 | 214 |
|                  |                                              | caffè solo o con grappa      | fsb         | bo     | water (inf)                  | QA             | young sheep            | Int (oral)      | 0,79                                 |                | ew   | 95  | 1830 | 219 |
|                  |                                              | caffè solo o con grappa      | fsb         | bo     | water (inf)                  | QA             | sheep                  | Int (oral)      | 0,8                                  |                | ew   | 97  | 1830 | 219 |
|                  |                                              | caffè e grappa               | fsb         | bo     | water (dec)                  | QA             | goat                   | Int (oral)      | 1,46                                 |                | rd   | 52  | 1866 | 223 |
|                  |                                              | caffè e grappa               | fsb         | bo     | water (dec)                  | QA             | goat                   | Int (oral)      | 1,46                                 |                | rd   | na  | 1867 | 224 |
| caffè e grappa   | fsb                                          | bo                           | water (dec) | QA     | cattle                       | Int (oral)     | na                     |                 | na                                   | 88             | 1875 | 227 |      |     |
| Scrophulariaceae | <i>Euphrasia rostkoviana</i> Hayne           | eufrasia Augentrost          | her         | wh     | water (inf)                  | QS             | goat                   | exal (conj)     |                                      | 0,96           | ew   | 95  | 1775 | 212 |
|                  |                                              | eufrasia                     | her         | wh     | water (inf)                  | QS             | cat                    | exal (conj)     |                                      | 1,2            | ew   | 92  | 1849 | 224 |
| Solanaceae       | <i>Nicotiana tabacum</i> L.                  | sigarette                    | lea         | bo     | water (rt)                   | QP             | cattle, calf           | exin (epicutan) |                                      | 0,02           | ew   | 91  | 1795 | 214 |
|                  | <i>Nicotiana tabacum</i> L.                  | sigarette                    | lea         | bo     | water (rt)                   | QP             | goat, young goat       | exin (epicutan) |                                      | 0,02           | ew   | 89  | 1795 | 214 |
| Urticaceae       | <i>Urtica dioica</i> L.                      | ortica                       | her         | wh     | none                         | Varia/GS       | turkey                 | Int (oral)      | 3,9                                  |                | od   | 93  | 1723 | 203 |
|                  |                                              | ortica                       | her         | wh     | none                         | Varia/GS       | young turkey           | Int (oral)      | 7,58                                 |                | od   | 93  | 1723 | 203 |
|                  |                                              | ortica                       | her         | wh     | none                         | Varia/GS       | hen                    | Int (oral)      | 25                                   |                | od   | 95  | 1723 | 203 |

| Botanical family | Plant species                | Recepy name designated by DP | Plant part | Origin | Extraction procedure on farm | ATCvet code | Animal species treated | Administration  | Daily dosage (g/kg <sup>0.75</sup> ) | Conc. (g/100g) | Ver | VAS | RN   | DP  |
|------------------|------------------------------|------------------------------|------------|--------|------------------------------|-------------|------------------------|-----------------|--------------------------------------|----------------|-----|-----|------|-----|
| Urticaceae       | <i>Urtica dioica</i> L. (vs) | ortica                       | her        | wh     | none                         | Varia/GS    | hen                    | Int (oral)      | 25                                   |                | od  | 93  | 1723 | 203 |
|                  |                              | ortica piccola               | her        | wh     | none                         | Varia/GS    | goat                   | Int (oral)      | 26,6                                 |                | od  | 89  | 1730 | 204 |
|                  |                              | ortica                       | her        | wh     | none                         | QS          | hen                    | Int (oral)      | na                                   |                | na  | na  | 1803 | 214 |
|                  |                              | ortica                       | her        | wh     | none                         | Varia/GS    | hen                    | Int (oral)      | 4                                    |                | rd  | 76  | 1820 | 217 |
|                  |                              | ortica                       | her        | wh     | none                         | QG          | hen                    | Int (oral)      | 1                                    |                | rd  | 98  | 1854 | 223 |
|                  |                              | ortica                       | her        | wh     | none                         | Varia/GS    | hen                    | Int (oral)      | 1                                    |                | rd  | 98  | 1856 | 224 |
|                  |                              | ortica                       | her        | wh     | none                         | Varia/GS    | cattle, calf           | exin (epicutan) |                                      | da             | rd  | na  | 1856 | 224 |
|                  | <i>Urtica urens</i> L.       | ortica                       | her        | wh     | none                         | Varia/GS    | goat                   | Int (oral)      | 26,6                                 |                | od  | 86  | 1729 | 204 |
|                  |                              | ortica(per le galline        | lea        | wh     | none                         | Varia/GS    | hen                    | Int (oral)      | 1                                    |                | ew  | 99  | 1749 | 209 |
|                  |                              | ortica                       | her        | wh     | none                         | QA          | cattle                 | Int (oral)      | 0,04                                 |                | rd  | 70  | 1767 | 211 |
|                  |                              | ortica                       | her        | wh     | none                         | QA          | horse                  | Int (oral)      | 0,04                                 |                | rd  | 70  | 1767 | 211 |
|                  |                              | ortica                       | her        | wh     | none                         | QA          | horse                  | Int (oral)      | 0,04                                 |                | rd  | 70  | 1767 | 211 |
|                  |                              | ortica                       | her        | wh     | none                         | QA          | calf                   | Int (oral)      | 0,20                                 |                | rd  | 70  | 1767 | 211 |
|                  |                              | ortica                       | her        | wh     | none                         | QA          | goat                   | Int (oral)      | 0,27                                 |                | rd  | 70  | 1767 | 211 |
|                  |                              | ortica                       | her        | wh     | none                         | QA          | young goat             | Int (oral)      | 0,53                                 |                | rd  | 70  | 1767 | 211 |
|                  |                              | ortica                       | her        | wh     | none                         | QA          | hen                    | Int (oral)      | 5                                    |                | rd  | 67  | 1767 | 211 |
|                  |                              | ortica                       | her        | wh     | none                         | QA          | hen                    | Int (oral)      | 5                                    |                | rd  | 70  | 1767 | 211 |
|                  |                              | ortica                       | her        | wh     | water (inf)                  | QA          | cattle                 | Int (oral)      | na                                   |                | na  | na  | 1784 | 213 |
|                  |                              | ortica                       | her        | wh     | none                         | QG          | hen                    | Int (oral)      | 1                                    |                | rd  | 99  | 1853 | 223 |
|                  |                              | ortica                       | her        | wh     | none                         | Varia/GS    | hen                    | Int (oral)      | 1                                    |                | rd  | 99  | 1855 | 224 |
|                  |                              | ortica                       | her        | wh     | none                         | Varia/GS    | cattle                 | exin (epicutan) |                                      | da             | rd  | na  | 1855 | 224 |
|                  |                              | ortica per i maiali          | her        | wh     | water (dec)                  | Varia/GS    | pig                    | Int (oral)      | 0,75                                 |                | ew  | 90  | 1878 | 209 |



**b) German speaking Cantons (Recipe number starts with 1138; Dialog partner starts with 133)**

| Botanical family   | Plant species                            | Recipe name designated by DP | Plant part | Origin       | Extraction procedure on farm | ATCvet Code [21] | Animal treated  | Administration  | Daily dosage [g/kg0.75] | Conc. [g/100g] | Ver  | VAS  | RN   | DP  |
|--------------------|------------------------------------------|------------------------------|------------|--------------|------------------------------|------------------|-----------------|-----------------|-------------------------|----------------|------|------|------|-----|
| <b>Aloeaceae</b>   | <i>Aloe vera</i> (L.) Burm.f.            | Aloe Vera                    | lea        | bo*          | none                         | QD               | cattle, calf    | exal (konj)     |                         | na             | na   | 99   | 1154 | 136 |
| <b>Apiaceae</b>    | <i>Carum carvi</i> L.                    | Kümmel                       | fsb        | bo           | water (inf)                  | QA               | calf            | int (oral)      | 0,21                    |                | od   | 57   | 1641 | 191 |
|                    |                                          | Fencheltee mit Yoghurt       | fsb        | bo           | water (inf)                  | QA               | calf            | int (oral)      | 0,16                    |                | od   | 77   | 1175 | 136 |
|                    |                                          | Fencheltee                   | fsb        | bo           | water (inf)                  | QA               | calf            | int (oral)      | 0,39                    |                | od   | 74   | 1666 | 195 |
| <b>Araliaceae</b>  | <i>Panax ginseng</i> C.A. Meyer          | Ginseng                      | rob        | cu           | none                         | GS               | calf            | int (oral)      | 0,06                    |                | od   | 91   | 1665 | 195 |
|                    |                                          | Ginseng                      | rob        | cu           | none                         | QA               | cattle          | int (oral)      | na                      |                | na   |      | 1665 | 195 |
|                    |                                          | Ginseng                      | rob        | cu           | water (dec)                  | GS               | bee             | int (oral)      | na                      |                | na   |      | 1670 | 195 |
|                    |                                          | Ginseng                      | rob        | cu           | water (dec)                  | GS               | hen             | int (oral)      | na                      |                | na   |      | 1670 | 195 |
| <b>Aspidiaceae</b> | <i>Dryopteris filix-mas</i> L. (Schott.) | Farn                         | lea        | wh           | none                         | para             | hen             | tohe            |                         | tohe           | tohe | 77   | 1682 | 198 |
|                    |                                          | Farn                         | her        | wh           | none                         | QA               | hen             | int (oral)      | na                      |                | na   | 70   | 1690 | 199 |
| <b>Asteraceae</b>  | <i>Achillea millefolium</i> L.           | Schafgarbe                   | her        | cu           | none                         | QA               | sheep           | int (oral)      | na                      |                | na   | 71   | 1144 | 134 |
|                    |                                          | Schafgarbentee               | flo        | wh           | water (dec)                  | QA               | calf            | int (oral)      | 1,47                    |                | ew   | 80   | 1151 | 135 |
|                    |                                          | Schafgarbentee               | flo        | wh           | water (dec)                  | QA               | calf            | int (oral)      | 1,47                    |                | ew   | 92   | 1151 | 135 |
|                    |                                          | Schafgarbentee               | her        | wh           | water (inf)                  | QA               | bee             | int (oral)      | na                      |                | na   | 65   | 1180 | 139 |
|                    |                                          | Schafgarbentee               | her        | wh           | water (inf)                  | behav            | cattle          | int (oral)      | 0,39                    |                | od   | 65   | 1185 | 139 |
|                    | <i>Arnica montana</i> L.                 | Arnikaöl                     | flo        | bo*          | oil/fat (-)                  | mast             | cattle          | exin (epicutan) |                         | na             | na   | 97   | 1556 | 142 |
|                    |                                          | Arnikatinktur                | flo        | wh           | alcohol (rt)                 | QM               | goat            | int (oral)      | na                      | 0,22           | od   | 94   | 1574 | 181 |
|                    |                                          | Arnikatinktur                | flo        | wh           | alcohol (rt)                 | QD               | goat            | int (oral)      | na                      | 0,22           | od   | 92   | 1574 | 181 |
|                    |                                          | Arnikatinktur                | flo        | wh           | alcohol (rt)                 | QM               | goat            | exin (epicutan) |                         | 0,22           | od   | 90   | 1574 | 181 |
|                    |                                          | Arnikatinktur                | flo        | wh           | alcohol (rt)                 | QM               | goat            | exin (epicutan) |                         | 0,22           | od   | 74   | 1574 | 181 |
|                    |                                          | Arnikaöl                     | flo        | bo*          | oil/fat (-)                  | mast             | cattle          | exin (epicutan) |                         | na             | na   | 78   | 1600 | 185 |
|                    |                                          | Arnikaöl                     | flo        | bo*          | oil/fat (-)                  | QG               | cattle          | exin (epicutan) |                         | na             | na   | 50   | 1600 | 185 |
|                    |                                          | Arnikaöl                     | flo        | bo*          | oil/fat (-)                  | QD               | cattle          | exal (epicutan) |                         | na             | na   | 93   | 1635 | 191 |
|                    |                                          | Arnikatinktur                | flo        | wh           | alcohol (rt)                 | QD               | cattle, calf    | exal (epicutan) |                         | na             | na   | 59   | 1701 | 201 |
|                    | <i>Artemisia absinthium</i> L.           | Wermut-Tee                   | lea        | wh           | water (inf)                  | QA               | cattle          | int (oral)      | 0,01                    |                | od   | 75   | 1200 | 141 |
|                    | <i>Calendula officinalis</i> L.          | Ringelblumensalbe            | flo        | cu           | oil/fat (rt)                 | QD               | cattle, calf    | exal (epicutan) |                         | 0,82           | rd   | 95   | 1148 | 134 |
|                    |                                          | Ringelblumensalbe            | flo        | cu           | oil/fat (rt)                 | QD               | cattle, calf    | exal (epicutan) |                         | 0,82           | rd   | 60   | 1148 | 134 |
|                    |                                          | Ringelblumensalbe            | flo        | cu           | oil/fat (rt)                 | QD               | hen             | exal (epicutan) |                         | 0,82           | rd   | 90   | 1148 | 134 |
|                    |                                          | Calendula-Tinktur            | flo        | bo*          | n.a.                         | QD               | calf            | exal (epicutan) |                         | na             | na   | 97   | 1192 | 140 |
| Ringelblumensalbe  |                                          | flo                          | cu         | oil/fat (et) | QD                           | cattle           | exal (epicutan) |                 | 0,44                    | rd             | 70   | 1558 | 142  |     |
| Ringelblumensalbe  |                                          | flo                          | cu         | oil/fat (rt) | QD                           | goat             | exal (epicutan) |                 | na                      | na             | 93   | 1567 | 181  |     |

| Botanical family | Plant species                       | Recipe name designated by DP | Plant part  | Origin | Extraction procedure on farm | ATCvet Code [21] | Animal treated | Administration  | Daily dosage [g/kg0.75] | Conc. [g/100g] | Ver  | VAS | RN   | DP  |
|------------------|-------------------------------------|------------------------------|-------------|--------|------------------------------|------------------|----------------|-----------------|-------------------------|----------------|------|-----|------|-----|
| Asteraceae       | <i>Calendula officinalis</i> L.     | Ringelblumensalbe            | flo         | cu     | oil/fat (et)                 | mast             | cattle         | exin (epicutan) |                         | 3,33           | rd   | 52  | 1612 | 188 |
|                  |                                     | Ringelblumensalbe            | flo         | cu     | oil/fat (et)                 | QD               | cattle         | exal (epicutan) |                         | 3,33           | rd   | 98  | 1612 | 188 |
|                  |                                     | Ringelblumensalbe            | flo         | cu     | oil/fat (et)                 | QD               | cattle, calf   | exal (epicutan) |                         | 3,33           | rd   | 92  | 1612 | 188 |
|                  |                                     | Ringelblumensalbe            | flo         | cu     | oil/fat (et)                 | QD               | cattle         | exal (epicutan) |                         | 0,84           | ew   | 100 | 1640 | 191 |
|                  |                                     | Ringelblumensalbe            | flo         | cu     | oil/fat (et)                 | QD               | cattle         | exal (epicutan) |                         | 0,84           | ew   | 99  | 1640 | 191 |
|                  |                                     | Ringelblumensalbe            | flo         | cu     | oil/fat (et)                 | QD               | horse          | exal (epicutan) |                         | 0,84           | ew   | 71  | 1640 | 191 |
|                  |                                     | Ringelblumensalbe            | flo         | cu     | oil/fat (rt)                 | QD               | cattle         | exal (epicutan) |                         | 0,96           | rd   | 93  | 1700 | 201 |
|                  |                                     | Ringelblumensalbe            | flo         | cu     | oil/fat (rt)                 | QD               | cattle, calf   | exal (epicutan) |                         | 0,96           | rd   | 97  | 1700 | 201 |
|                  |                                     | Ringelblumensalbe            | flo         | cu     | oil/fat (rt)                 | QD               | horse          | exal (epicutan) |                         | 0,96           | rd   | 83  | 1700 | 201 |
|                  |                                     | Ringelblumensalbe            | flo         | cu     | oil/fat (et)                 | QD               | cattle, calf   | exin (epicutan) |                         | 0,22           | rd   | 85  | 1587 | 299 |
|                  | <i>Matricaria recutita</i> L. (vs*) | Kamillentee                  | her         | wh     | water (inf)                  | GS               | cattle         | int (oral)      | 0,13                    |                | ew   | 99  | 1149 | 135 |
|                  |                                     | Kamillentee                  | flo         | wh     | water (dec)                  | QA               | calf           | int (oral)      | 0,6                     |                | rd   | 87  | 1150 | 135 |
|                  |                                     | Kamillentee                  | flo         | bo     | water (inf)                  | QA               | calf           | int (oral)      | 0,08                    |                | rd   | 34  | 1207 | 142 |
|                  |                                     | Kamillentee                  | flo         | bo     | water (inf)                  | QA               | calf           | int (oral)      | 0,29                    |                | od   | 79  | 1579 | 182 |
|                  |                                     | Kamillentee                  | flo         | cu     | water (dec)                  | QA               | calf           | int (oral)      | 0,08                    |                | rd   | 70  | 1590 | 184 |
|                  |                                     | Kamillentee                  | flo         | bo     | water (inf)                  | QA               | calf           | int (oral)      | 0,55                    |                | rd   | 97  | 1597 | 185 |
|                  |                                     | Kamillentinktur              | flo         | wh     | alcohol (rt)                 | QD               | cattle, calf   | exal (epicutan) |                         | 3,52           | rd   | 77  | 1605 | 187 |
|                  |                                     | Kamillentinktur              | flo         | wh     | alcohol (rt)                 | QD               | cattle, calf   | exal (epicutan) |                         | 3,52           | rd   | 87  | 1605 | 187 |
|                  |                                     | Kamillentee                  | flo         | wh     | water (dec)                  | QA               | calf           | int (oral)      | 0,07                    |                | ew   | 88  | 1606 | 187 |
|                  |                                     | Kamillentee                  | flo         | cu     | water (inf)                  | QA               | pig            | int (oral)      | 0,28                    |                | rd   | 68  | 1615 | 188 |
|                  |                                     | Kamillentee                  | flo         | cu     | water (inf)                  | varia            | pig            | int (oral)      | 0,06                    |                | rd   | 57  | 1615 | 188 |
|                  |                                     | Kamillentee                  | flo         | cu     | water (inf)                  | QA               | calf           | int (oral)      | 0,09                    |                | rd   | 70  | 1615 | 188 |
|                  |                                     | Kamillentee                  | flo         | cu     | water (inf)                  | QG               | cattle         | exal (epicutan) |                         | 0,15           | rd   | 47  | 1615 | 188 |
|                  |                                     | Kamillentee                  | flo         | cu     | water (inf)                  | QG               | pig            | exin (epicutan) |                         | 0,15           | rd   | 63  | 1615 | 188 |
|                  |                                     | Kamillentee                  | flo         | bo     | water (inf)                  | QA               | calf           | int (oral)      | 0,16                    |                | rd   | 77  | 1618 | 189 |
|                  |                                     | Kamillentee                  | flo         | bo     | water (inf)                  | QA               | cattle         | int (oral)      | 0,05                    |                | rd   | 100 | 1597 | 191 |
|                  |                                     | Kamillentinktur              | flo         | bo*    | n.a.                         | QD               | cattle, calf   | exal (epicutan) |                         | na             | na   | 54  | 1636 | 191 |
|                  |                                     | Kamillentinktur              | flo         | bo*    | n.a.                         | QD               | horse          | exal (epicutan) |                         | na             | na   | 57  | 1636 | 191 |
|                  |                                     | Kamillentee                  | her         | cu     | water (inf)                  | QA               | calf           | int (oral)      | 2,47                    |                | od   | 100 | 1639 | 191 |
|                  |                                     | Kamillentee                  | her         | cu     | water (inf)                  | QA               | calf           | int (oral)      | 1,88                    |                | od   | 100 | 1639 | 191 |
|                  |                                     | Kamillentee                  | flo         | bo     | water (inf)                  | QA               | calf           | int (oral)      | 0,34                    |                | od   | 72  | 1650 | 193 |
|                  |                                     | Kamillentee                  | flo         | wh     | water (inf)                  | QA               | calf           | int (oral)      | 0,53                    |                | rd   | 55  | 1672 | 196 |
|                  |                                     | Kamillentee                  | flo         | wh     | water (inf)                  | QD               | calf           | exal (epicutan) |                         | 0,6            | rd   | 53  | 1672 | 196 |
| Kamillentee      | flo                                 | wh                           | water (inf) | QD     | calf                         | exal (epicutan)  |                | 0,6             | rd                      | 65             | 1672 | 196 |      |     |

| Botanical family | Plant species                                          | Recipe name designated by DP | Plant part | Origin | Extraction procedure on farm | ATCvet Code [21] | Animal treated | Administration  | Daily dosage [g/kg0.75] | Conc. [g/100g] | Ver  | VAS | RN   | DP  |
|------------------|--------------------------------------------------------|------------------------------|------------|--------|------------------------------|------------------|----------------|-----------------|-------------------------|----------------|------|-----|------|-----|
| Asteraceae       | <i>Matricaria recutita</i> L.(vs*)                     | Kamillentee                  | flo        | bo     | water (inf)                  | QA               | calf           | int (oral)      | 0,71                    |                | od   | 82  | 1683 | 198 |
|                  |                                                        | Kamillentee                  | flo        | bo     | water (inf)                  | QA               | cattle         | int (oral)      | 0,12                    |                | od   | 34  | 1683 | 198 |
|                  |                                                        | Kamillentee                  | flo        | bo     | water (inf)                  | QA               | calf           | int (oral)      | 0,53                    |                | od   | 88  | 1683 | 198 |
|                  |                                                        | Kamillentee                  | her        | wh     | water (inf)                  | QA               | calf           | int (oral)      | 0,78                    |                | od   | 56  | 1688 | 199 |
|                  |                                                        | Kamillentee                  | flo        | bo     | water (inf)                  | QD               | cattle         | exal (konj)     |                         | 0,5            | od   | 50  | 1699 | 201 |
|                  |                                                        | Kamillentee                  | flo        | bo     | water (inf)                  | QD               | hen            | exal (epicutan) |                         | 0,5            | od   | 80  | 1699 | 201 |
|                  |                                                        | Kamillentee                  | flo        | bo     | water (inf)                  | QD               | horse          | exal (konj)     |                         | 0,5            | od   | na  | 1699 | 201 |
|                  |                                                        | Kamillentee                  | flo        | wh     | water (inf)                  | QA               | cattle         | int (oral)      | 0,03                    |                | rd   | na  | 1708 | 202 |
|                  |                                                        | Kamillentee                  | flo        | wh     | water (inf)                  | QD               | cattle, calf   | exal (epicutan) |                         | 0,22           | rd   | na  | 1708 | 202 |
| Berberidaceae    | <i>Berberis vulgaris</i> L.                            | Berberitzenäste              | twb        | wh     | none                         | QD               | cattle, calf   | tohe            |                         | tohe           | tohe | 71  | 1174 | 136 |
|                  |                                                        | Berberitze                   | twb        | wh     | none                         | QD               | cattle, calf   | tohe            |                         | tohe           | tohe | 100 | 1681 | 197 |
|                  |                                                        | Berberitze                   | twb        | wh     | none                         | QD               | calf           | tohe            |                         | tohe           | tohe | 79  | 1689 | 199 |
| Boraginaceae     | <i>Symphytum officinale</i> L. (vs*)                   | Beinwellblätter              | lea        | cu     | none                         | QA               | calf           | int (oral)      | 0,5                     |                | ew   | 47  | 1146 | 134 |
|                  |                                                        | Beinwellblätter              | lea        | cu     | none                         | QA               | cattle         | int (oral)      | 0,1                     |                | ew   | 47  | 1146 | 134 |
|                  |                                                        | Beinwellsalbe                | rob        | cu     | oil/fat (et)                 | QD               | cattle, calf   | exal (epicutan) |                         | 0,35           | od   | 86  | 1147 | 134 |
|                  |                                                        | Beinwellsalbe                | rob        | cu     | oil/fat (et)                 | QM               | cattle, calf   | exin (epicutan) |                         | 0,35           | od   | 81  | 1147 | 134 |
|                  |                                                        | Wallwurzsalbe                | rob        | bo*    | alcohol (-)                  | mast             | cattle         | exin (epicutan) |                         | na             | na   | 84  | 1557 | 142 |
|                  |                                                        | Wallwurzsalbe                | rob        | bo*    | alcohol (-)                  | QM               | cattle         | exin (epicutan) |                         | na             | na   | 69  | 1557 | 142 |
|                  |                                                        | Beinwellsalbe                | rob        | wh     | oil/fat (et)                 | QD               | pig            | exal (epicutan) |                         | na             | na   | 88  | 1584 | 183 |
|                  |                                                        | Beinwellsalbe                | rob        | wh     | alcohol (rt)                 | QD               | pig            | exal (epicutan) |                         | na             | na   | 62  | 1584 | 183 |
|                  |                                                        | Beinwellsalbe                | rob        | wh     | oil/fat (et)                 | QM               | pig            | exin (epicutan) |                         | na             | na   | 87  | 1584 | 183 |
|                  |                                                        | Beinwellsalbe                | rob        | wh     | alcohol (rt)                 | QM               | pig            | exin (epicutan) |                         | na             | na   | 87  | 1584 | 183 |
|                  |                                                        | Beinwellsalbe                | rob        | wh     | oil/fat (et)                 | QM               | pig            | exin (epicutan) |                         | na             | na   | 87  | 1584 | 183 |
|                  |                                                        | Beinwellsalbe                | rob        | wh     | alcohol (rt)                 | QM               | pig            | exin (epicutan) |                         | na             | na   | 87  | 1584 | 183 |
|                  |                                                        | Wallwurzsalbe                | rob        | bo*    | n.a.                         | mast             | cattle         | exin (epicutan) |                         | na             | na   | 98  | 1599 | 185 |
|                  |                                                        | Wallwurzsalbe                | rob        | wh     | water (dec)                  | QM               | cattle, calf   | exin (epicutan) |                         | 0,05           | rd   | 79  | 1608 | 187 |
|                  |                                                        | Wallwurzsalbe                | rob        | wh     | water (dec)                  | QM               | cattle, calf   | exin (epicutan) |                         | 0,05           | rd   | 78  | 1608 | 187 |
|                  |                                                        | Wallwurzgel                  | rob        | bo*    | n.a.                         | mast             | cattle         | exin (epicutan) |                         | na             | na   | 94  | 1622 | 189 |
|                  |                                                        | Wallwurzgel                  | rob        | bo*    | alcohol (-)                  | QD               | cattle, calf   | exal (epicutan) |                         | na             | na   | 99  | 1634 | 191 |
| Brassicaceae     | <i>Armoracia rusticana</i> G.Gaertn., B.Mey. & Scherb. | Meerrettich                  | rob        | cu     | none                         | QA               | pig            | int (oral)      | 0,28                    |                | od   | 94  | 1654 | 194 |
|                  |                                                        | Meerrettichtee               | rob        | cu     | water (inf)                  | QA               | calf           | int (oral)      | 1,18                    |                | od   | 82  | 1655 | 194 |
|                  |                                                        | Meerrettich                  | rob        | cu     | none                         | GS               | cattle         | int (oral)      | 3,89                    |                | od   | 81  | 1656 | 194 |
|                  |                                                        | Meerrettich                  | rob        | cu     | none                         | QM               | cattle, calf   | exin (epicutan) |                         | 1,33           | od   | 89  | 1657 | 194 |

| Botanical family      | Plant species                                          | Recipe name designated by DP | Plant part | Origin | Extraction procedure on farm | ATCvet Code [21] | Animal treated | Administration  | Daily dosage [g/kg0.75] | Conc. [g/100g] | Ver | VAS | RN   | DP  |
|-----------------------|--------------------------------------------------------|------------------------------|------------|--------|------------------------------|------------------|----------------|-----------------|-------------------------|----------------|-----|-----|------|-----|
| <b>Brassicaceae</b>   | <i>Armoracia rusticana</i> G.Gaertn., B.Mey. & Scherb. | Meerrettich                  | rob        | cu     | none                         | mast             | cattle         | exin (epicutan) |                         | 1,33           | od  | 57  | 1657 | 194 |
| <b>Brassicaceae</b>   | <i>Capsella bursa-pastoris</i> L.                      | Hirtentäschli                | her        | wh     | none                         | QG               | cattle         | int (oral)      | na                      |                | na  | 100 | 1199 | 141 |
| <b>Cannabaceae</b>    | <i>Cannabis sativa</i> L.                              | Hanfsalbe                    | flo        | bo*    | n.a.                         | mast             | cattle         | exin (epicutan) |                         | na             | na  | 84  | 1592 | 184 |
|                       |                                                        | Hanfsalbe                    | her        | cu     | oil/fat (et)                 | mast             | cattle         | exin (epicutan) |                         | na             | na  | 70  | 1671 | 196 |
|                       |                                                        | Hanfsalbe                    | her        | cu     | oil/fat (et)                 | varia            | cattle         | exin (epicutan) |                         | na             | na  | 75  | 1671 | 196 |
|                       |                                                        | Hanfsalbe                    | her        | cu     | oil/fat (et)                 | varia            | cattle         | exin (epicutan) |                         | na             | na  | 83  | 1671 | 196 |
|                       |                                                        | Hanfsalbe                    | her        | cu     | oil/fat (et)                 | QM               | cattle         | exin (epicutan) |                         | na             | na  | 88  | 1671 | 196 |
| <b>Caprifoliaceae</b> | <i>Sambucus nigra</i> L.                               | Holder                       | twb        | wh     | none                         | QA               | cattle         | na              |                         | da             | na  | na  | 1716 | 202 |
| <b>Ericaceae</b>      | <i>Arctostaphylos uva-ursi</i> (L.) Spreng.            | Bärentraubenblätter tee      | lea        | bo     | water (dec)                  | QG               | cattle         | int (oral)      | 0,13                    |                | od  | 91  | 1193 | 140 |
| <b>Fagaceae</b>       | <i>Quercus robur</i> L.                                | Eichenrindentee              | bar        | bo     | water (inf)                  | QA               | pig            | int (oral)      | 1,69                    |                | rd  | 69  | 1138 | 133 |
|                       |                                                        | Eichenrinde                  | bar        | bo     | none                         | QA               | calf           | int (oral)      | 0,72                    |                | rd  | 82  | 1209 | 142 |
|                       |                                                        | Eichenrindentee              | bar        | bo     | water (inf)                  | QA               | calf           | int (oral)      | 0,6                     |                | rd  | 49  | 1210 | 142 |
|                       |                                                        | Eichenrinde                  | bar        | bo     | none                         | QA               | calf           | int (oral)      | 1,33                    |                | rd  | 81  | 1617 | 189 |
|                       |                                                        | Eichenrindentee              | bar        | bo     | water (inf)                  | QA               | calf           | int (oral)      | 2,82                    |                | rd  | 72  | 1629 | 190 |
|                       |                                                        | Eichenrindenpulver           | bar        | bo     | none                         | QA               | calf           | int (oral)      | 0,94                    |                | ew  | 67  | 1630 | 190 |
|                       |                                                        | Eichenrinde                  | bar        | bo     | none                         | QA               | pig            | int (oral)      | 0,008                   |                | rd  | 18  | 1596 | 191 |
| <b>Hypericaceae</b>   | <i>Hypericum perforatum</i> L.(vs)                     | Johannisöl                   | flo        | cu     | oil/fat (rt)                 | QG               | cattle         | exin (epicutan) |                         | 0,3            | ew  | 86  | 1143 | 134 |
|                       |                                                        | Johanniskrautöl              | flo        | wh     | oil/fat (rt)                 | QM               | goat           | exin (epicutan) |                         | na             | na  | 93  | 1569 | 181 |
|                       |                                                        | Johanniskrautöl              | her        | wh     | oil/fat (rt)                 | QD               | cattle         | exal (epicutan) |                         | na             | na  | 79  | 1702 | 201 |
| <b>Juglandaceae</b>   | <i>Juglans regia</i> L.                                | Nussbaumspray                | lea        | wh     | water (dec)                  | para             | goat           | exin (epicutan) |                         | na             | na  | 94  | 1570 | 181 |
| <b>Lamiaceae</b>      | <i>Origanum vulgare</i> L.                             | Oreganoöl                    | n.a        | bo*    | oil/fat (-)                  | QA               | hen            | int (oral)      | na                      |                | na  | 81  | 1677 | 197 |
|                       |                                                        | Oreganoöl                    | n.a        | bo*    | oil/fat (-)                  | QA               | hen            | int (oral)      | na                      |                | na  | 93  | 1677 | 197 |
|                       | <i>Thymus vulgaris</i> L.                              | Thymian                      | her        | bo     | none                         | QA               | calf           | int (oral)      | 0,14                    |                | rd  | 99  | 1196 | 140 |
|                       |                                                        | Thymian                      | her        | bo     | none                         | QR               | calf           | int (oral)      | 0,78                    |                | rd  | 96  | 1196 | 140 |
|                       |                                                        | Thymian                      | her        | bo     | none                         | varia            | calf           | int (oral)      | 0,14                    |                | rd  | 97  | 1196 | 140 |
|                       |                                                        | Thymian                      | her        | bo     | none                         | varia            | cattle         | int (oral)      | 0,31                    |                | rd  | 99  | 1196 | 140 |
|                       |                                                        | Thymian                      | her        | bo     | none                         | mast             | cattle         | int (oral)      | 0,07                    |                | rd  | 78  | 1213 | 142 |
|                       |                                                        | Thymiantee                   | her        | bo     | water (inf)                  | QA               | calf           | int (oral)      | 0,34                    |                | rd  | 56  | 1598 | 185 |
|                       |                                                        | Thymiantee                   | her        | bo     | water (inf)                  | QD               | pig            | exal (epicutan) |                         | 0,43           | rd  | 83  | 1598 | 185 |
|                       |                                                        | Thymiantee                   | her        | bo     | water (inf)                  | QA               | calf           | int (oral)      | 0,98                    |                | rd  | 82  | 1621 | 189 |
|                       |                                                        | Thymiantee                   | her        | bo     | water (inf)                  | QR               | calf           | int (oral)      | 0,19                    |                | rd  | 43  | 1621 | 189 |
|                       |                                                        | Thymian                      | her        | bo     | none                         | QR               | calf           | int (oral)      | 0,16                    |                | od  | 99  | 1637 | 191 |
|                       |                                                        | Thymiantee                   | her        | bo     | water (inf)                  | QR               | calf           | int (oral)      | 0,37                    |                | od  | 83  | 1638 | 191 |

| Botanical family    | Plant species                      | Recipe name designated by DP      | Plant part | Origin | Extraction procedure on farm | ATCvet Code [21] | Animal treated | Administration  | Daily dosage [g/kg0.75] | Conc. [g/100g] | Ver  | VAS | RN   | DP  |
|---------------------|------------------------------------|-----------------------------------|------------|--------|------------------------------|------------------|----------------|-----------------|-------------------------|----------------|------|-----|------|-----|
| <b>Lauraceae</b>    | <i>Cinnamomum camphora</i> L.      | Kampfersalbe                      | n.a        | bo*    | none                         | mast             | cattle         | exin (epicutan) |                         | na             | na   | 46  | 1183 | 139 |
|                     | <i>Laurus nobilis</i> L.           | Lorbeerfrüchte-Versäuerungspulver | fsb        | bo*    | water (inf)                  | QG               | cattle         | int (oral)      | na                      |                | na   | 52  | 1197 | 140 |
| <b>Liliaceae</b>    | <i>Allium cepa</i> L.              | Zwiebel                           | rob        | cu     | water (rt)                   | GS               | cattle         | int (oral)      | 0,33                    |                | rd   | 68  | 1604 | 187 |
|                     |                                    | Zwiebel                           | rob        | cu     | water (rt)                   | QA               | cattle         | int (oral)      | 0,33                    |                | rd   | 64  | 1604 | 187 |
| <b>Linaceae</b>     | <i>Linum usitatissimum</i> L.      | Flachschleim                      | fsb        | bo     | water (inf)                  | QA               | calf           | int (oral)      | 1,51                    |                | rd   | 82  | 1588 | 184 |
|                     |                                    | Leinsamen                         | fsb        | bo     | none                         | QG               | cattle         | int (oral)      | 0,28                    |                | rd   | na  | 1703 | 201 |
|                     |                                    | Leinsamen                         | fsb        | bo     | water (inf)                  | QG               | cattle         | int (oral)      | na                      |                | na   | na  | 1714 | 202 |
| <b>Malvaceae</b>    | <i>Althaea officinalis</i> L.      | Eibischsalbe                      | rob        | cu     | water (dec)                  | mast             | cattle         | exin (epicutan) |                         | na             | na   | 61  | 1182 | 139 |
|                     |                                    | Eibischsalbe                      | rob        | bo     | oil/fat (rt)                 | mast             | cattle         | exin (epicutan) |                         | na             | na   | 52  | 1611 | 188 |
|                     | <i>Malva sylvestris</i> L.         | Käslkraut                         | her        | wh     | water (inf)                  | QD               | cattle, calf   | exal (epicutan) |                         | na             | na   | na  | 1709 | 202 |
| <b>Papaveraceae</b> | <i>Chelidonium majus</i> L.        | Schöllkraut                       | lea        | cu     | none                         | QD               | cattle, calf   | exal (epicutan) |                         | da             | na   | 55  | 1589 | 184 |
| <b>Pinaceae</b>     | <i>Abies alba</i> Mill.            | Weisstannenäste                   | twb        | wh     | none                         | QR               | calf           | int (nasal)     |                         | na             | na   | 96  | 1177 | 136 |
|                     |                                    | Weisstannenharz                   | exc        | wh     | none                         | QD               | cattle, calf   | exal (epicutan) |                         | da             | na   | 56  | 1642 | 192 |
|                     | <i>Picea abies</i> (L.)H. Karst.   | Harzsalbe                         | exc        | wh     | oil/fat (et)                 | QD               | goat           | exal (epicutan) |                         | 9,92           | ew   | 97  | 1568 | 181 |
|                     |                                    | Harzsalbe                         | exc        | wh     | oil/fat (et)                 | QD               | goat           | exal (epicutan) |                         | 9,92           | ew   | 97  | 1568 | 181 |
|                     |                                    | Harzsalbe                         | exc        | wh     | oil/fat (et)                 | QD               | goat           | exal (epicutan) |                         | 9,92           | ew   | 96  | 1568 | 181 |
|                     |                                    | Tannenhäute                       | twb        | wh     | none                         | QR               | calf           | int (oral)      | na                      |                | na   | 53  | 1620 | 189 |
| <b>Poaceae</b>      | <i>Avena sativa</i> L.             | Habersuppe                        | fsb        | bo     | water (inf)                  | QA               | calf           | int (oral)      | 19,61                   |                | ew   | 93  | 1208 | 142 |
|                     |                                    | Haferschleim                      | fsb        | bo     | water (inf)                  | QA               | calf           | int (oral)      | 20,59                   |                | od   | 74  | 1667 | 195 |
| <b>Polygonaceae</b> | <i>Rumex obtusifolius</i> L. (vs*) | Blackentee                        | rob        | wh     | water (dec)                  | QA               | calf           | int (oral)      | 0,8                     |                | od   | 86  | 1188 | 139 |
|                     |                                    | Blackentee                        | rob        | wh     | water (dec)                  | QA               | calf           | int (oral)      | 0,16                    |                | na   | 87  | 1189 | 139 |
|                     |                                    | Blackenöl                         | lea        | wh     | oil/fat (rt)                 | QD               | cattle, calf   | exal (epicutan) |                         | 23,72          | od   | 100 | 1201 | 141 |
|                     |                                    | Blackenöl                         | lea        | wh     | oil/fat (rt)                 | QD               | cattle, calf   | exal (epicutan) |                         | 23,72          | od   | 100 | 1201 | 141 |
|                     |                                    | Blackentinktur                    | lea        | wh     | alcohol (rt)                 | QD               | cattle, calf   | exal (epicutan) |                         | 0,01           | rd   | 97  | 1204 | 141 |
|                     |                                    | Blackentinktur                    | lea        | wh     | alcohol (rt)                 | QD               | cattle, calf   | exal (epicutan) |                         | 0,01           | rd   | 99  | 1204 | 141 |
|                     |                                    | Blackentinktur                    | lea        | wh     | alcohol (rt)                 | QM               | cattle, calf   | exal (epicutan) |                         | 0,01           | rd   | 100 | 1204 | 141 |
|                     |                                    | Blackentinktur                    | lea        | wh     | alcohol (rt)                 | QM               | cattle, calf   | int (oral)      | na                      |                | na   | 98  | 1204 | 141 |
|                     |                                    | Blacke                            | wpr        | wh     | none                         | QA               | pig            | int (oral)      | na                      |                | na   | 53  | 1562 | 180 |
|                     |                                    | Blackentee                        | rob        | wh     | water (dec)                  | QA               | calf           | int (oral)      | 1,57                    |                | od   | 78  | 1575 | 182 |
| <b>Rhamnaceae</b>   | <i>Rhamnus catharticus</i> L.      | Kreuzdorn                         | twb        | wh     | none                         | QD               | cattle, calf   | tohe            |                         | tohe           | tohe | 74  | 1142 | 134 |
|                     |                                    | Kreuzdorn                         | twb        | cu     | none                         | QD               | cattle, calf   | tohe            |                         | tohe           | tohe | 51  | 1181 | 139 |
|                     |                                    | Kreuzdorn                         | twb        | cu     | none                         | QD               | cattle, calf   | tohe            |                         | tohe           | tohe | 81  | 1563 | 180 |

| Botanical family        | Plant species                                | Recipe name designated by DP | Plant part | Origin | Extraction procedure on farm | ATCVet Code [21] | Animal treated | Administration  | Daily dosage [g/kg0.75] | Conc. [g/100g] | Ver  | VAS | RN   | DP  |
|-------------------------|----------------------------------------------|------------------------------|------------|--------|------------------------------|------------------|----------------|-----------------|-------------------------|----------------|------|-----|------|-----|
| <b>Rhamnaceae</b>       | <i>Rhamnus catharticus</i> L.                | Kreuzdorn                    | twb        | wh     | none                         | QD               | calf           | tohe            |                         | tohe           | tohe | 65  | 1591 | 184 |
|                         |                                              | Kreuzdorn                    | twb        | wh     | none                         | QD               | cattle, calf   | tohe            |                         | tohe           | tohe | 77  | 1601 | 186 |
|                         |                                              | Kreuzdorn                    | twb        | wh     | none                         | QD               | cattle, calf   | tohe            |                         | tohe           | tohe | 91  | 1660 | 195 |
|                         |                                              | Kreuzdorn                    | twb        | wh     | none                         | QD               | calf           | tohe            |                         | tohe           | tohe | 62  | 1675 | 196 |
|                         |                                              | Kreuzdorn                    | twb        | wh     | none                         | QD               | calf           | tohe            |                         | tohe           | tohe | 58  | 1687 | 198 |
| <b>Rosaceae</b>         | <i>Alchemilla mollis</i> (Buser) Rothm.      | Frauenmântelitee             | lea        | wh     | water (inf)                  | QD               | cattle         | exal (epicutan) |                         | 0,03           | rd   | 84  | 1178 | 136 |
|                         |                                              | Frauenmântelitee             | lea        | wh     | water (inf)                  | QD               | cattle, calf   | exal (epicutan) |                         | 0,03           | rd   | 77  | 1178 | 136 |
|                         |                                              | Frauenmânteli                | her        | cu     | none                         | QG               | cattle         | int (oral)      | 0,31                    |                | od   | 64  | 1211 | 142 |
|                         | <i>Malus domestica</i> Borkh.                | Zimtapfel                    | fsb        | bo     | none                         | QG               | cattle         | int (oral)      | na                      |                | na   | 27  | 1212 | 142 |
|                         | <i>Potentilla anserina</i> L.                | Gänsefingerkraut             | lea        | wh     | water (dec)                  | QA               | calf           | int (oral)      | 0,02                    |                | rd   | 45  | 1593 | 184 |
|                         | <i>Potentilla erecta</i> (L.) Räuschel (vs*) | Blutwurzinktur               | rob        | wh     | alcohol (rt)                 | QD               | cattle, calf   | exal (epicutan) |                         | na             | na   | 91  | 1583 | 183 |
|                         |                                              | Blutwurzinktur               | rob        | wh     | alcohol (rt)                 | QD               | cattle, calf   | exal (epicutan) |                         | na             | na   | 92  | 1583 | 183 |
|                         |                                              | Blutwurzinktur               | rob        | wh     | alcohol (rt)                 | QD               | pig            | exal (epicutan) |                         | na             | na   | 88  | 1583 | 183 |
|                         |                                              | Tormentillpulver             | rob        | bo     | water (rt)                   | QA               | calf           | int (oral)      | 2,16                    |                | od   | 100 | 1695 | 200 |
|                         |                                              | Tormentillpulver             | rob        | bo     | milk (rt)                    | QA               | calf           | int (oral)      | 1,73                    |                | od   | na  | 1697 | 200 |
| <b>Rubiaceae</b>        | <i>Coffea</i> spp.                           | Kafi-Schnaps                 | fsb        | bo     | water (inf)                  | QA               | cattle         | int (oral)      | 0,05                    |                | ew   | 83  | 1141 | 134 |
|                         |                                              | Kafi-Schnaps                 | fsb        | bo     | water (inf)                  | QA               | cattle         | int (oral)      | 0,16                    |                | rd   | 59  | 1565 | 180 |
|                         |                                              | Kafi-Schnaps                 | fsb        | bo     | water (inf)                  | varia            | cattle         | int (oral)      | 0,16                    |                | rd   | 82  | 1565 | 180 |
|                         |                                              | Kafi-Schnaps                 | fsb        | bo     | water (inf)                  | GS               | cattle         | int (oral)      | 0,16                    |                | rd   | 79  | 1602 | 187 |
|                         |                                              | Kafi-Schnaps                 | fsb        | bo     | water (inf)                  | QA               | cattle         | int (oral)      | 0,07                    |                | rd   | 73  | 1651 | 193 |
|                         |                                              | Kafi-Schnaps                 | fsb        | bo     | water (inf)                  | QA               | cattle         | int (oral)      | 0,07                    |                | rd   | 62  | 1651 | 193 |
|                         |                                              | Kafi-Schnaps                 | fsb        | bo     | water (inf)                  | GS               | cattle         | int (oral)      | 0,23                    |                | rd   | 86  | 1658 | 194 |
|                         |                                              | Kaffeebohnsensatz            | fsb        | bo     | water (inf)                  | QA               | calf           | int (oral)      | 9,8                     |                | od   | 76  | 1668 | 195 |
|                         |                                              | Kafi-Schnaps                 | fsb        | bo     | water (inf)                  | GS               | cattle         | int (oral)      | na                      |                | na   | 68  | 1673 | 196 |
|                         |                                              | Kafi-Schnaps                 | fsb        | bo     | water (inf)                  | QA               | cattle         | int (oral)      | na                      |                | na   | 78  | 1678 | 197 |
|                         |                                              | Kafi-Schnaps                 | fsb        | bo     | water (inf)                  | QA               | cattle         | int (oral)      | 0,04                    |                | rd   | 74  | 1693 | 199 |
| <b>Rutaceae</b>         | <i>Citrus x limon</i> (L.) Burm.f.           | Zitronenessig                | fsb        | bo     | water (inf)                  | GS               | cattle         | int (oral)      | 0,78                    |                | rd   | 100 | 1205 | 142 |
|                         |                                              | Zitronenessig                | fsb        | bo     | water (inf)                  | GS               | cattle         | int (oral)      | 0,78                    |                | rd   | 97  | 1205 | 142 |
| <b>Scrophulariaceae</b> | <i>Euphrasia rostkoviana</i> Hayne           | Augentrostsalbe              | her        | wh     | oil/fat (rt)                 | QD               | goat           | exal (konj)     |                         | na             | na   | 91  | 1572 | 181 |
|                         |                                              | Augentrostöl                 | her        | wh     | oil/fat (rt)                 | QD               | goat           | exal (konj)     |                         | na             | na   | 95  | 1573 | 181 |
| <b>Theaceae</b>         | <i>Camellia sinensis</i> (L.) O. Kuntze      | Schwarztee                   | lea        | bo     | water (inf)                  | QA               | calf           | int (oral)      | 0,27                    |                | od   | 80  | 1578 | 182 |
|                         |                                              | Schwarztee                   | lea        | bo     | water (inf)                  | QA               | calf           | int (oral)      | 0,39                    |                | od   | 66  | 1647 | 193 |
|                         |                                              | Schwarztee                   | lea        | bo     | water (inf)                  | QA               | calf           | int (oral)      | 0,39                    |                | od   | 75  | 1648 | 193 |

| Botanical family  | Plant species                            | Recipe name designated by DP | Plant part | Origin | Extraction procedure on farm | ATCvet Code [21] | Animal treated | Administration | Daily dosage [g/kg0.75] | Conc. [g/100g] | Ver | VAS | RN   | DP  |
|-------------------|------------------------------------------|------------------------------|------------|--------|------------------------------|------------------|----------------|----------------|-------------------------|----------------|-----|-----|------|-----|
| <b>Theaceae</b>   | <i>Camellia sinensis</i> (L.) O. Kuntze. | Schwarztee                   | lea        | bo     | water (inf)                  | QA               | calf           | int (oral)     | 0,47                    |                | od  | 88  | 1704 | 201 |
|                   |                                          | Schwarztee                   | lea        | bo     | water (inf)                  | QA               | calf           | int (oral)     | 0,37                    |                | rd  | na  | 1710 | 202 |
| <b>Urticaceae</b> | <i>Urtica dioica</i> L. (vs*)            | Brennessel                   | her        | cu     | none                         | QA               | hen            | int (oral)     | 0,6                     |                | ew  | 73  | 1145 | 134 |
|                   |                                          | Brennesselblätter            | lea        | bo     | none                         | varia            | cattle         | int (oral)     | 0,16                    |                | na  | 47  | 1194 | 140 |
|                   |                                          | Brennesselblätter            | lea        | bo     | none                         | QA               | cattle         | int (oral)     | 0,05                    |                | rd  | 77  | 1560 | 142 |
|                   |                                          | Brennesselkraut              | her        | wh     | none                         | QA               | goat           | int (oral)     | na                      |                | na  | 93  | 1571 | 181 |
|                   |                                          | Brennesselkraut              | her        | wh     | none                         | GS               | calf           | int (oral)     | na                      |                | na  | 88  | 1580 | 182 |
|                   |                                          | Brennesselkraut              | her        | wh     | none                         | QA               | calf           | int (oral)     | na                      |                | na  | 63  | 1580 | 182 |
|                   |                                          | Brennesseltee                | lea        | bo     | water (inf)                  | varia            | calf           | int (oral)     | 0,08                    |                | rd  | 69  | 1619 | 189 |
|                   |                                          | Brennesseltee                | lea        | bo     | water (inf)                  | varia            | calf           | int (oral)     | 0,08                    |                | rd  |     | 1619 | 189 |
|                   |                                          | Brennessel                   | lea        | wh     | none                         | behav            | pig            | int (oral)     | na                      |                | na  | 74  | 1631 | 190 |
|                   |                                          | Brennessel                   | her        | wh     | none                         | QA               | cattle         | int (oral)     | na                      |                | na  | 93  | 1684 | 198 |
|                   |                                          | Brennessel                   | her        | wh     | none                         | QA               | pig            | int (oral)     | na                      |                | na  | 93  | 1684 | 198 |
