# Supplementary material for: Swiss ethnoveterinary knowledge on medicinal plants – a within-country comparison of Italian speaking regions with north-western German speaking regions
Source: Springer Nature journal article supplement (doi:10.1186/s13002-016-0106-y), 2017-01-03
Supplement: MOESM2 [file 11970084]

## Additional Document II – List of all reported plant species used to treat animals in West Alps regions

### Abbreviation:

#### Own data

**ItR:** Italian speaking Region of our study

**GeC:** German speaking Cantons of our study

#### Reference data

**CH1:** [23]: Schmid K, Ivemeyer S, Vogl C, Klarer F, Meier B, Hamburger M, Walkenhorst M: Traditional use of herbal remedies in livestock by farmers in 3 swiss cantons (aargau, zurich, schaffhausen). *Forschende Komplementarmedizin* 2012;19:125-136.

**CH2:** [22]: Disler M, Ivemeyer S, Hamburger M, Vogl C, Tesic A, Klarer F, Meier B, Walkenhorst M: Ethnoveterinary herbal remedies used by farmers in four north-eastern swiss cantons (st. Gallen, thurgau, appenzell innerrhoden and appenzell ausserrhoden). *Journal of Ethnobiology and Ethnomedicine* 2014;10:32.

**IT1:** [24]: Pieroni A, Giusti ME: Alpine ethnobotany in italy: Traditional knowledge of gastronomic and medicinal plants among the occitans of the upper varaita valley, piedmont. *Journal of Ethnobiology and Ethnomedicine* 2009;5

**IT2:** [26]: Vitalini S, Iriti M, Puricelli C, Ciuchi D, Segale A, Fico G: Traditional knowledge on medicinal and food plants used in val san giacomo (sondrio, italy) - an alpine ethnobotanical study. *Journal of Ethnopharmacology* 2013;145:517-529.

**IT3:** [27]: Vitalini S, Tomè F, Fico G: Traditional uses of medicinal plants in Valvestino (italy). *Journal of Ethnopharmacology* 2009;121:106-116.

**IT4:** [28]: Mattalia G, Quave CL, Pieroni A: 74 Traditional uses of wild food and medicinal plants among Brigasc, Kyé, and Provençal communities on the Western Italian Alps. *Genetic Resources and Crop Evolution* 2013;60:587-603.

**IT5:** [25]: Cornara L, La Rocca A, Marsili S, Mariotti MG: Traditional uses of plants in the eastern riviera (Liguria, Italy). *Journal of Ethnopharmacology* 2009;125:16-30.

| Plant species                                                                           | IsR | GsC | CH       | Italian data  |
|-----------------------------------------------------------------------------------------|-----|-----|----------|---------------|
| <i>Abies alba</i> Mill.                                                                 | x   | x   | CH2      |               |
| <i>Achillea millefolium</i> L.                                                          | x   | x   | CH2      | IT1, IT2, IT3 |
| <i>Achillea moschata</i> Jacq.                                                          |     |     |          | IT2           |
| <i>Alchemilla alpina</i> L. or <i>Alchemilla conjuncta</i> Bab.                         |     |     |          | IT2           |
| <i>Alchemilla mollis</i> (Buser) Rothm.                                                 |     | x   |          |               |
| <i>Alchemilla vulgaris</i> L. em. S.E. Frohner or <i>Alchemilla xanthochlora</i> Rothm. |     |     | CH2      | IT2           |
| <i>Aleopecurus pratensis</i> L.                                                         |     |     |          | IT4           |
| <i>Allium cepa</i> L.                                                                   | x   | x   | CH1, CH2 |               |
| <i>Allium sativum</i> L.                                                                | x   |     | CH2      |               |
| <i>Aloe vera</i> (L.) Burm.f.                                                           |     | x   | CH1      |               |
| <i>Allium ursinum</i> L.                                                                | x   |     |          |               |
| <i>Althaea officinalis</i> L.                                                           |     | x   | CH2      |               |
| <i>Anthyllis vulneraria</i> L.s.str.                                                    |     |     | CH2      |               |
| <i>Arctostaphylos uva-ursi</i> (L.) Spreng.                                             |     | x   |          |               |
| <i>Armoracia rusticana</i> G.Gaertn., B.Mey. & Scherb.                                  |     | x   |          |               |
| <i>Arnica chamissonis</i> Less.                                                         |     |     | CH2      |               |

|                                                                           |   |   |          |               |
|---------------------------------------------------------------------------|---|---|----------|---------------|
| <i>Arnica montana</i> L.                                                  | x | x | CH1, CH2 | IT2           |
| <i>Artemisia absinthium</i> L.                                            | x | x | CH1      | IT4, IT1, IT2 |
| <i>Artemisia campestris</i> L.                                            | x |   |          |               |
| <i>Artemisia vulgaris</i> L.                                              |   |   |          | IT1           |
| <i>Arum Italicum</i> Mill.                                                |   |   |          | IT5           |
| <i>Avena sativa</i> L.                                                    | x | x | CH1, CH2 | IT1           |
| <i>Beta vulgaris</i> subsp. <i>vulgaris</i> (conditiva- group)            |   |   | CH2      |               |
| <i>Betula pendula</i> Roth.                                               |   |   | CH2      |               |
| <i>Berberis vulgaris</i> L.                                               |   | x |          |               |
| <i>Brassica napus</i> L.                                                  |   |   | CH1, CH2 |               |
| <i>Brassica oleracea</i> L.                                               | x |   | CH2      | IT1           |
| <i>Calendula officinalis</i> L.                                           | x | x | CH1, CH2 |               |
| <i>Camellia sinensis</i> (L.) O. Kuntze.                                  |   | x | CH1, CH2 |               |
| <i>Cannabis sativa</i> L.                                                 |   | x | CH2      |               |
| <i>Capsella bursa-pastoris</i> L.                                         |   | x | CH2      |               |
| <i>Carum carvi</i> L.                                                     |   | x | CH1, CH2 |               |
| <i>Castanea sativa</i> Mill.                                              | x |   |          |               |
| <i>Cetraria islandica</i> (L.) Ach.                                       |   |   |          | IT2           |
| <i>Chelidonium majus</i> L.                                               |   | x | CH1      |               |
| <i>Chenopodium bonus-henricus</i> L.                                      |   |   | CH2      | IT1           |
| <i>Cinnamomum camphora</i> L.                                             |   | x |          |               |
| <i>Cinnamomum verum</i> J.Presl.                                          | x |   | CH2      |               |
| <i>Citrus x limon</i> (L.) Burm.f.                                        |   | x | CH2      |               |
| <i>Clematis vitalba</i> L.                                                |   |   |          | IT5           |
| <i>Coffea</i> L.                                                          | x | x | CH1, CH2 |               |
| <i>Crataegus laevigata</i> (Poir.) DC. or <i>Crataegus monogyna</i> Jacq. |   |   | CH2      |               |
| <i>Cucurbita maxima</i> Duch.                                             | x |   |          |               |
| <i>Dryopteris filix-mas</i> (L.) Schot.                                   | x | x | CH2      |               |
| <i>Equisetum arvense</i> L.                                               |   |   | CH2      | IT5           |
| <i>Equisetum ramosissimum</i> Desf.                                       |   |   |          | IT5           |
| <i>Equisetum telemateia</i> Ehrh.                                         |   |   |          | IT5           |
| <i>Eugenia caryophyllata</i> Thunb.                                       | x |   |          |               |
| <i>Eucalyptus globulus</i> Labill.                                        |   |   | CH1      |               |
| <i>Euphrasia rostkoviana</i> Hayne                                        | x | x | CH1, CH2 |               |
| <i>Festuca arundinaceae</i> Schreb.                                       |   |   |          | IT4           |
| <i>Ficus carica</i> L.                                                    |   |   |          | IT5           |
| <i>Filipendula ulmaria</i> (L.) Maxim.                                    |   |   | CH1      |               |
| <i>Foeniculum vulgare</i> Mill.                                           | x | x | CH1, CH2 | IT5           |
| <i>Fraxinus excelsior</i> L.                                              |   |   | CH2      |               |
| <i>Fregaria vesca</i> L.                                                  |   |   |          | IT4           |
| <i>Gentiana acaulis</i> L.                                                |   |   |          | IT4           |
| <i>Gentiana lutea</i> L.                                                  |   |   | CH2      | IT4           |
| <i>Gentiana punctata</i> L.                                               |   |   |          | IT2           |
| <i>Gentiana purpurea</i> L.                                               | x |   |          | IT2           |
| <i>Gentiana verna</i> L.                                                  |   |   |          | IT4           |
| <i>Geranium robertianum</i> L.                                            |   |   | CH1, CH2 |               |

|                                                      |   |   |          |               |
|------------------------------------------------------|---|---|----------|---------------|
| <i>Helianthus annuus</i> L.                          |   |   | CH2      |               |
| <i>Helleborus foetidus</i> L.                        |   |   |          | IT5           |
| <i>Helleborus viridis</i> L.                         |   |   |          | IT5           |
| <i>Hordeum vulgare</i> L.                            | x |   |          |               |
| <i>Humulus lupulus</i> L.                            |   |   | CH1      |               |
| <i>Hyoseris radiata</i> L.                           |   |   |          | IT5           |
| <i>Hypericum perforatum</i> L.                       | x | x | CH1, CH2 | IT5           |
| <i>Ilex aquifolium</i> L.                            |   |   | CH2      |               |
| <i>Juglans regia</i> L.                              | x | x | CH1, CH2 |               |
| <i>Juniperi communis</i> ssp. Alpina Celak.          |   |   | CH2      |               |
| <i>Juniperus communis</i> L.                         |   |   |          | IT5           |
| <i>Juniperus oxycedrus</i> L.                        |   |   |          | IT5           |
| <i>Laburnum alpinum</i> (Mill.) Berecht. & J.Presl   |   |   |          | IT1           |
| <i>Larix decidua</i> Mill.                           |   |   |          | IT2           |
| <i>Laurus nobilis</i> L.                             |   | x |          |               |
| <i>Lavandula angustifolia</i> Mill.                  | x |   | CH1, CH2 |               |
| <i>Linum usitatissimum</i> L.                        | x | x | CH1, CH2 |               |
| <i>Lycopodium clavatum</i> L.                        |   |   | CH2      |               |
| <i>Malus domestica</i> Borkh.                        |   | x | CH2      |               |
| <i>Malva neglecta</i> Wallr.                         | x |   | CH1, CH2 | IT2, IT3      |
| <i>Malva sylvestris</i> L.                           | x | x | CH1      |               |
| <i>Matricaria recutita</i> L.                        | x | x | CH1, CH2 | IT5           |
| <i>Melaleuca alternifolia</i> (Maiden&Betche) Cheel. |   |   | CH2      |               |
| <i>Mentha arvensis</i> var piperascens               |   |   | CH1      |               |
| <i>Mentha x piperita</i> L.                          |   |   | CH2      |               |
| <i>Mercurialis annua</i> L.                          |   |   |          | IT5           |
| <i>Myristica fragrans</i> Houtt.                     |   |   | CH1, CH2 |               |
| <i>Nicotiana tabacum</i> L.                          | x |   |          |               |
| <i>Olea europaea</i> L.                              | x |   | CH2      |               |
| <i>Oreganum majorana</i> L.                          |   |   | CH1      |               |
| <i>Origanum vulgare</i> L.                           |   | x | CH1      |               |
| <i>Oryza sativa</i> L.                               | x |   |          |               |
| <i>Panax ginseng</i> C.A. Meyer                      |   | x |          |               |
| <i>Parietaria officinalis</i> L.                     |   |   |          | IT5           |
| <i>Pedicularis verticillata</i> L.                   |   |   | CH2      |               |
| <i>Pelargonium sidoides</i> DC                       |   |   | CH2      |               |
| <i>Petroselinum crispum</i> (Mill.) Fuss             |   |   | CH2      |               |
| <i>Peucedanum ostruthium</i> (L.) W.D.J.Koch         |   |   |          | IT1           |
| <i>Picea abies</i> (L.) H. Karst.                    | x | x | CH1, CH2 | IT2           |
| <i>Plantago lanceolata</i> L.                        |   |   | CH1, CH2 | IT5, IT1      |
| <i>Plantago major</i> L. s.l.                        |   |   |          | IT5, IT1, IT2 |
| <i>Potentilla anserina</i> L.                        |   | x |          |               |
| <i>Potentilla erecta</i> (L.) Rauschel.             | x | x | CH2      |               |
| <i>Prunus domestica</i> L.                           |   |   | CH2      |               |
| <i>Prunus spinosa</i> L.                             |   |   | CH2      |               |
| <i>Quassia amara</i> L.                              |   |   | CH2      |               |

|                                                                  |   |   |          |                    |
|------------------------------------------------------------------|---|---|----------|--------------------|
| <i>Quercus robur</i> L. or <i>Quercus petraea</i> (Matt.) Liebl. | x | x | CH1, CH2 |                    |
| <i>Ranunculus bulbosus</i> L.                                    |   |   |          | IT5                |
| <i>Reichardia picroides</i> (L.) Roth.                           |   |   |          | IT5                |
| <i>Rhamnus catharticus</i> L.                                    | x | x | CH1, CH2 |                    |
| <i>Rhododendron ferrugineum</i> L.                               |   |   |          | IT2                |
| <i>Ricinus communis</i> L.                                       | x |   |          |                    |
| <i>Rubus idaeus</i> L.                                           |   |   | CH2      |                    |
| <i>Rumex alpinus</i> L.                                          |   |   |          | IT1, IT2           |
| <i>Rumex crispus</i> L.                                          |   |   |          | IT5                |
| <i>Rumex obtusifolius</i> L.                                     |   | x | CH1, CH2 | IT5                |
| <i>Rumex sanguineus</i> L.                                       |   |   |          | IT5                |
| <i>Ruta angustifolia</i> Pers.                                   |   |   |          | IT5                |
| <i>Ruta chalapensis</i> L.                                       |   |   |          | IT5                |
| <i>Ruta graveolens</i> L.                                        |   |   |          | IT5                |
| <i>Salix caprea</i> L.                                           |   |   | CH2      |                    |
| <i>Salvia officinalis</i> L.                                     |   |   | CH1, CH2 |                    |
| <i>Salvia verbenacea</i> L.                                      | x |   |          |                    |
| <i>Sambucus nigra</i> L.                                         |   | x | CH2      |                    |
| <i>Sanicula europaea</i> L.                                      |   |   | CH1, CH2 |                    |
| <i>Senecio alpinus</i> (L.)                                      |   |   | CH2      |                    |
| <i>Senecio ovatus</i> (G. Gaertn. & Al.) Willd.                  |   |   | CH2      |                    |
| <i>Solanum tuberosum</i> L.                                      |   |   | CH1, CH2 |                    |
| <i>Solidago virgaurea</i> L.                                     |   |   | CH2      |                    |
| <i>Sonchus oleraceus</i> L.                                      |   |   |          | IT5                |
| <i>Stellaria media</i> (L.) Vill.                                | x |   |          |                    |
| <i>Symphytum officinale</i> L.                                   | x | x | CH1, CH2 |                    |
| <i>Tanacetum parthenium</i> (L.) Sch. Bip.                       |   |   | CH2      |                    |
| <i>Tanacetum vulgare</i> L.                                      |   |   | CH2      |                    |
| <i>Taraxacum officinale</i> WEB. Ex Wigg.                        | x |   | CH1      |                    |
| <i>Thuja occidentalis</i> L.                                     |   |   | CH1, CH2 |                    |
| <i>Thymus pulegioides</i> L.                                     |   |   |          | IT5                |
| <i>Thymus vulgaris</i> L.                                        |   | x | CH1, CH2 | IT5                |
| <i>Tilia cordata</i> Mill. or <i>Tilia platyphyllos</i> Scop.    |   |   | CH1, CH2 |                    |
| <i>Triticum aestivum</i> L.                                      | x |   |          |                    |
| <i>Tropaeolum majus</i> L.                                       |   |   | CH1, CH2 |                    |
| <i>Urtica dioica</i> L.                                          | x | x | CH1, CH2 | IT5                |
| <i>Urtica urens</i> L.                                           | x |   |          |                    |
| <i>Vaccinium myrtillus</i> L.                                    |   |   | CH2      |                    |
| <i>Veratrum album</i> L.                                         |   |   |          | IT4, IT1, IT2, IT3 |
| <i>Veronica allionii</i> Vill.                                   |   |   |          | IT1                |
| <i>Viscum album</i> L.                                           | x |   |          |                    |
| <i>Vitis vinifera</i> L.                                         |   |   | CH1      |                    |
